# Supplementary material
Source: publisher figshare collection journal article supplement (https://acs.figshare.com/ndownloader/files/4127479)

# Total Synthesis of (+)-Aureol

Kevin K. W. Kuan, Henry P. Pepper, Witold M. Bloch, and Jonathan H. George\*

*School of Chemistry & Physics, University of Adelaide, North Terrace, Adelaide SA 5005,  
Australia.*

## Supporting Information

### Table of Contents

|                                                      |    |
|------------------------------------------------------|----|
| 1. General methods.....                              | 2  |
| 2. Experimental procedures.....                      | 3  |
| 3. $^1\text{H}$ and $^{13}\text{C}$ NMR spectra..... | 12 |

## 1. General methods

All chemicals used were purchased from commercial suppliers and used as received. All organic extracts were dried over anhydrous magnesium sulfate. Thin layer chromatography was performed using Merck aluminium sheets silica gel 60 F<sub>255</sub>. Visualisation was aided by viewing under a UV lamp and staining with CAM stain followed by heating. All R<sub>f</sub> values were rounded to the nearest 0.05. Flash chromatography was performed using Davisil (40-63 micron) grade silica gel. Melting points were recorded on a SRS Digimelt MPA 161 melting apparatus and are uncorrected. Infrared spectra were recorded using a Perkin Elmer Spectrum BX FT-IR system spectrometer as the neat compounds. Optical rotations were obtained on a P0A1 AR21 polarimeter. <sup>1</sup>H and <sup>13</sup>C NMR spectra were recorded using a Varian Inova-6000 spectrometer (<sup>1</sup>H at 600 MHz, <sup>13</sup>C at 150 MHz) or a Bruker AV400 spectrometer (<sup>1</sup>H at 400 MHz, <sup>13</sup>C at 100 MHz). The NMR solvent used was CDCl<sub>3</sub> unless otherwise specified. <sup>1</sup>H chemical shifts are reported in ppm on the  $\delta$ -scale relative to TMS ( $\delta$  0.0) and <sup>13</sup>C NMR are reported in ppm relative to chloroform ( $\delta$  77.0). Multiplicities are reported as (br) broad, (s) singlet, (d) doublet, (t) triplet, (q) quartet, (qnt) quintet, (sxt) sextet and (m) multiplet. All *J* values were rounded to the nearest 0.5 Hz. EI low resolution mass spectra were recorded on a Shimadzu GCMS-QP 5050A mass spectrometer. ESI high resolution mass spectra were recorded using an LTQ Orbitrap XL ETD (Thermo Fisher Scientific Inc., MA).

## 2. Experimental procedures

### Diol I

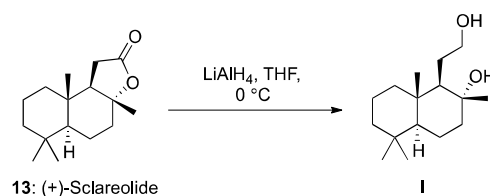

LiAlH<sub>4</sub> (2.0 M in THF, 20.0 mL, 40.0 mmol) was added dropwise to a solution of (+)-sclareolide **13** (10.0 g, 40.0 mmol) in anhydrous THF (100 mL) at 0 °C. The reaction mixture was then stirred at 0 °C for 1 h. The reaction was quenched with EtOAc (10 mL), then diluted with CH<sub>2</sub>Cl<sub>2</sub> (100 mL) and 1M HCl (150 mL). The mixture was extracted with CH<sub>2</sub>Cl<sub>2</sub> (2 × 100 mL), washed with 1M HCl, water and brine, then dried over MgSO<sub>4</sub>, filtered and the solvent was removed *in vacuo* to give crude diol **I** (9.76 g), which was used without further purification.

Data for **I**: R<sub>f</sub> 0.30 (petrol ether/EtOAc, 1:1); mp 128 – 130 °C; [α]<sub>D</sub><sup>25</sup> (c 1.11, CHCl<sub>3</sub>) -16.2°; IR (Diamond/ZnSe): 3230, 2918, 1460, 1441, 1389 cm<sup>-1</sup>; <sup>1</sup>H NMR (400 MHz, CDCl<sub>3</sub>): δ 3.74 (br s, 2H), 3.69 (dt, *J* = 10.0, 4.5 Hz, 1H), 3.39 – 3.33 (m, 1H), 1.83 (dt, *J* = 12.5, 3.0 Hz, 1H), 1.61 – 1.03 (overlapped m, 11H), 1.11 (s, 3H), 0.87 (m, 2H), 0.80 (s, 3H), 0.72 (s, 6H); <sup>13</sup>C NMR (100 MHz, CDCl<sub>3</sub>): δ 72.8, 63.9, 59.3, 56.0, 44.0, 41.9, 39.3, 38.9, 33.4, 33.2, 27.8, 24.5, 21.5, 20.4, 18.4, 15.3; HRMS (C<sub>16</sub>H<sub>30</sub>O<sub>2</sub>Na, ESI): calculated 277.2138 [M+Na]<sup>+</sup>, found 277.2134.

### Acetate ester 12

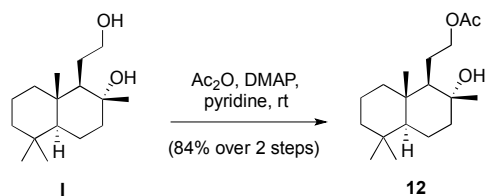

To a solution of diol **I** (9.58 g, 37.7 mmol) in CH<sub>2</sub>Cl<sub>2</sub> (80 mL) was added Ac<sub>2</sub>O (5.33 mL, 56.4 mmol) followed by pyridine (6.07 mL, 75.3 mmol). The reaction was stirred at rt under inert atmosphere overnight, then quenched with saturated NH<sub>4</sub>Cl solution (100 mL) and extracted with CH<sub>2</sub>Cl<sub>2</sub> (2 × 100 mL). The combined organic extracts were washed with saturated NH<sub>4</sub>Cl solution, water, and brine. The organic phase was then dried over MgSO<sub>4</sub>, filtered and the solvent was removed *in vacuo* to give crude product, which was purified by flash column chromatography (gradient elution, petrol ether/EtOAc, 5:1 → 1:1) to give acetate ester **12** as a colourless oil (9.66 g, 87%).

Data for **12**: R<sub>f</sub> 0.30 (petrol ether/EtOAc, 5:1); [α]<sub>D</sub><sup>25</sup> (c 1.76, CHCl<sub>3</sub>) +1.1°; IR (Diamond/ZnSe): 3472, 2925, 2868, 1736, 1721, 1460, 1388, 1366 cm<sup>-1</sup>; <sup>1</sup>H NMR (600 MHz, CDCl<sub>3</sub>): δ 4.16 – 4.08 (m, 2H), 2.05 (s, 3H), 1.89 (dt, *J* = 12.0, 3.0 Hz, 1H), 1.76 – 1.09 (overlapped m, 12H), 1.16 (s, 3H), 0.92 (d, *J* = 12.0 Hz, 2H), 0.87 (s, 3H), 0.79 (s, 6H); <sup>13</sup>C NMR (150 MHz, CDCl<sub>3</sub>): δ 171.1, 73.5, 66.6, 58.0, 56.0, 44.4, 41.9, 39.6, 38.7, 33.4, 33.3, 24.5, 23.9, 21.5, 21.1, 20.5, 18.4, 15.3; HRMS (C<sub>18</sub>H<sub>32</sub>O<sub>3</sub>Na, ESI): calculated 319.2244 [M+Na]<sup>+</sup>, found 319.2224.

## Acetate ester **11**

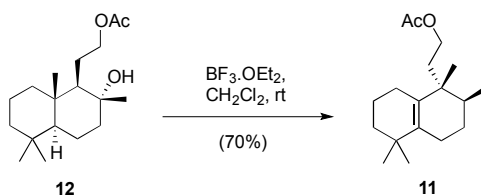

To a solution of acetate ester **12** (12.2 g, 41.0 mmol) in  $\text{CH}_2\text{Cl}_2$  (140 mL) at rt was added  $\text{BF}_3 \cdot \text{Et}_2\text{O}$  (20.2 mL, 163 mmol). The reaction was stirred at rt for 12 h, then diluted with  $\text{H}_2\text{O}$  (100 mL) and  $\text{CH}_2\text{Cl}_2$  (100 mL). The organic layer was separated and the aqueous phase was extracted with  $\text{CH}_2\text{Cl}_2$  ( $3 \times 50$  mL). The organic layers were combined, dried over  $\text{MgSO}_4$ , filtered and concentrated *in vacuo*. The crude material was purified by flash column chromatography (gradient elution, petrol ether/EtOAc, 100:0  $\rightarrow$  10:1) to give acetate ester **11** as a colourless oil (7.76 g, 70%).

Data for **11**:  $R_f$  0.70 (petrol ether/EtOAc, 5:1);  $[\alpha]_D^{25}$  (c 1.36,  $\text{CHCl}_3$ )  $-75.2^\circ$ ; IR (Diamond/ZnSe): 2924, 1741, 1458, 1364, 1231  $\text{cm}^{-1}$ ;  $^1\text{H}$  NMR (600 MHz,  $\text{CDCl}_3$ ):  $\delta$  4.06 – 4.01 (m, 1H), 3.87 – 3.83 (m, 1H), 2.06 – 1.27 (overlapped m, 13H), 2.02 (s, 3H), 0.97 (s, 3H), 0.95 (s, 3H), 0.88 (d,  $J = 7.0$  Hz, 3H), 0.84 (s, 3H);  $^{13}\text{C}$  NMR (150 MHz,  $\text{CDCl}_3$ ):  $\delta$  171.4, 137.5, 131.9, 62.3, 40.0, 39.9, 34.6, 34.6, 34.5, 29.2, 27.8, 27.3, 26.0, 25.2, 21.3, 21.2, 20.1, 16.3; HRMS ( $\text{C}_{18}\text{H}_{30}\text{O}_2\text{Na}$ , ESI): calculated 301.2138  $[\text{M}+\text{Na}]^+$ , found 301.2139.

## Alcohol **16**

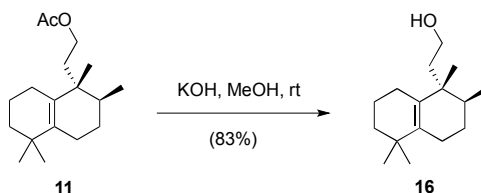

A 10% solution of  $\text{KOH}$  (21.9 g, 391 mmol) in  $\text{MeOH}$  (220 mL) was added to a flask containing ester **11** (7.74 g, 27.8 mmol). The reaction was stirred at rt for 30 min, then diluted with aqueous  $\text{NH}_4\text{Cl}$  and  $\text{Et}_2\text{O}$ . The organic layer was separated, the aqueous phase extracted with  $\text{Et}_2\text{O}$ , washed with brine, dried over  $\text{MgSO}_4$ , filtered and concentrated *in vacuo*. The crude alcohol was purified by flash column chromatography (gradient elution, petrol ether/EtOAc, 5:1  $\rightarrow$  3:1) to give alcohol **16** as a white solid (5.48 g, 83%).

Data for **16**:  $R_f$  0.35 (petrol ether/EtOAc, 5:1); mp  $46 - 48^\circ\text{C}$ ;  $[\alpha]_D^{25}$  (c 1.21,  $\text{CHCl}_3$ )  $-101.6^\circ$ ; IR (Diamond/ZnSe): 3308, 2923, 1458, 1359, 1015  $\text{cm}^{-1}$ ;  $^1\text{H}$  NMR (600 MHz,  $\text{CDCl}_3$ ):  $\delta$  3.63 – 3.59 (m, 1H), 3.51 – 3.47 (m, 1H), 2.04 – 1.30 (m, 14H), 0.98 (s, 3H), 0.95 (s, 3H), 0.88 (d,  $J = 7.0$  Hz, 3H), 0.84 (s, 3H);  $^{13}\text{C}$  NMR (150 MHz,  $\text{CDCl}_3$ ):  $\delta$  137.1, 132.6, 60.1, 39.9, 38.9, 34.6, 34.5, 29.1, 27.7, 27.2, 26.1, 25.1, 21.2, 19.9, 16.3; HRMS ( $\text{C}_{16}\text{H}_{28}\text{O}$ , EI): calculated 236.2140  $[\text{M}]^+$ , found 236.2141.

### 3,5-Dinitrobenzoate 17

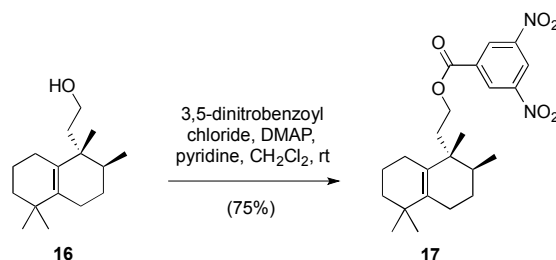

To a solution of alcohol **16** (400 mg, 1.69 mmol) in anhydrous  $\text{CH}_2\text{Cl}_2$  (5 mL) under  $\text{N}_2$  at rt was added 3,5-dinitrobenzoyl chloride (733 mg, 3.38 mmol), DMAP (21 mg, 0.17 mmol) and pyridine (0.27 mL, 3.38 mmol). The reaction mixture was stirred at rt for 18 h, then diluted with  $\text{CH}_2\text{Cl}_2$  (50 mL) and washed with 1 M HCl solution ( $2 \times 30$  mL). The organic phase was then dried over  $\text{MgSO}_4$ , filtered and concentrated *in vacuo* to give a yellow solid. Purification by flash chromatography on silica gel (gradient elution, petrol ether/ $\text{CH}_2\text{Cl}_2$ , 10:1  $\rightarrow$  1:1) gave **17** (545 mg, 75%) as a white solid. Recrystallisation of a sample of **17** from EtOH gave colourless crystals that were suitable for X-ray crystallographic analysis.

Data for **17**:  $R_f$  0.45 (petrol ether/EtOAc, 10:1); IR (Diamond/ $\text{ZnSe}$ ): 2877, 1720, 1543, 1461, 1346, 1282, 1169  $\text{cm}^{-1}$ ;  $^1\text{H}$  NMR (400 MHz,  $\text{CDCl}_3$ ):  $\delta$  9.21 (t,  $J = 2.0$  Hz, 1H), 9.14 (d,  $J = 2.0$  Hz, 2H), 4.42 – 4.35 (m, 1H), 4.30 – 4.24 (m, 1H), 2.09– 1.83 (m, 6H), 1.69 – 1.32 (m, 7H), 0.99 (s, 3H), 0.96 (s, 3H), 0.95 (d,  $J = 7.0$  Hz, 3H), 0.91 (s, 3H);  $^{13}\text{C}$  NMR (100 MHz,  $\text{CDCl}_3$ ): 162.6, 148.6, 138.1, 134.2, 131.2, 129.4, 122.2, 64.8, 40.1, 39.7, 34.7, 34.5, 34.3, 29.1, 27.6, 27.0, 26.0, 25.1, 21.0, 19.9, 16.2. HRMS ( $\text{C}_{23}\text{H}_{31}\text{N}_2\text{O}_6$ , ESI): calculated 431.2177  $[\text{M}+\text{H}]^+$ , found 431.2189.

### Aryl selenide 18

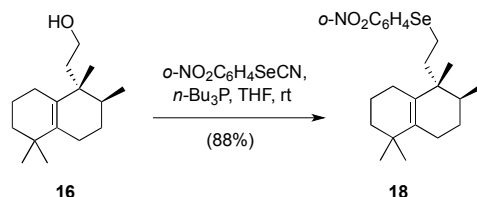

To a solution of alcohol **16** (1.30 g, 5.52 mmol) in anhydrous THF (25 mL) was added 2-nitrophenylselenocyanate (1.88 g, 8.29 mmol) and  $\text{Me}_3\text{P}$  (1.0 M in THF, 11.2 mL, 11.2 mmol) under  $\text{N}_2$  atmosphere. The reaction mixture was left to stir at rt for 1 h, then quenched with saturated  $\text{NH}_4\text{Cl}$  solution (50 mL). The mixture was extracted with  $\text{Et}_2\text{O}$  ( $3 \times 50$  mL). The organic phases were combined, washed with brine, dried over  $\text{MgSO}_4$ , filtered and concentrated *in vacuo*. The crude product was purified by flash column chromatography (gradient elution, petrol ether/EtOAc, 100:0  $\rightarrow$  10:1) to give aryl selenide **18** as a bright yellow oil (2.29 g, 88%).

Data for **18**:  $R_f$  0.55 (petrol ether/EtOAc, 10:1);  $[\alpha]_D^{25}$  (c 1.42,  $\text{CHCl}_3$ )  $-31.1^\circ$ ; IR (Diamond/ $\text{ZnSe}$ ): 2923, 1738, 1590, 1511, 1452, 1330, 728  $\text{cm}^{-1}$ ;  $^1\text{H}$  NMR (400 MHz,  $\text{CDCl}_3$ ):  $\delta$  8.19 (d,  $J = 8.0$  Hz, 1H), 7.44 – 7.41 (m, 2H), 7.24 – 7.19 (m, 1H), 2.80 – 2.73 (m, 1H), 2.52 – 2.45 (m, 1H), 1.95 – 1.93 (m, 3H), 1.73 – 1.25 (m, 10H), 0.91 (s, 6H), 0.81 (d,  $J = 7.0$  Hz, 3H), 0.78 (s, 3H);  $^{13}\text{C}$  NMR (100 MHz,  $\text{CDCl}_3$ ):  $\delta$  145.7, 137.2, 133.3, 132.5, 130.4, 128.1, 125.4, 124.2, 40.9, 38.8, 33.5, 33.2, 32.8, 28.2, 26.6, 26.0, 24.9, 24.0, 20.5, 19.9, 18.8, 15.3; HRMS ( $\text{C}_{22}\text{H}_{32}\text{NO}_2\text{Se}$ , EI): calculated 421.1521  $[\text{M}+\text{H}]^+$ , found 421.1510.

## Alkene 19

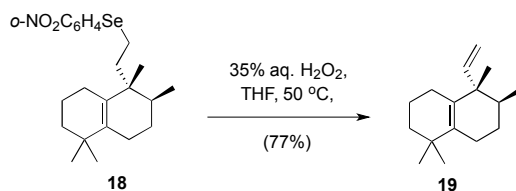

To a solution of aryl selenide **18** (2.23 g, 5.31 mmol) in THF (34 mL) was added 30% H<sub>2</sub>O<sub>2</sub> (1.09 mL, 10.6 mmol). The reaction mixture was left to stir at rt for 15 min, then heated to 50 °C for 45 min. The reaction mixture was quenched with Na<sub>2</sub>S<sub>2</sub>O<sub>3</sub> (50 mL) and extracted with Et<sub>2</sub>O (3 × 50 mL). The organic phases were combined, washed with brine, dried over MgSO<sub>4</sub>, filtered and concentrated *in vacuo*. The crude product was purified by flash column chromatography (neat petrol) to give alkene **19** as a colourless oil (900 mg, 77%).

Data for **19**: R<sub>f</sub> 0.80 (neat petrol); [α]<sub>D</sub><sup>25</sup> (c 1.52, CHCl<sub>3</sub>) +54.1°; IR (Diamond/ZnSe): 2923, 1631, 1459, 1360 cm<sup>-1</sup>; <sup>1</sup>H NMR (400 MHz, CDCl<sub>3</sub>): δ 5.55 (dd, *J* = 17.5, 10.5 Hz, 1H), 5.03 (dd, *J* = 10.5, 1.5 Hz, 1H), 4.88 (dd, *J* = 17.5, 1.5 Hz, 1H), 2.08 – 1.92 (m, 2H), 1.84 – 1.78 (m, 2H), 1.65 – 1.27 (m, 7H), 1.00 (s, 3H), 0.99 (s, 3H), 0.95 (s, 3H), 0.81 (d, *J* = 7.0 Hz, 3H); <sup>13</sup>C NMR (100 MHz, CDCl<sub>3</sub>): δ 147.9, 135.5, 131.2, 112.3, 45.0, 39.9, 37.0, 34.3, 28.6, 28.2, 27.5, 26.5, 24.0, 20.0, 17.4, 15.9; HRMS (C<sub>16</sub>H<sub>26</sub>, EI): calculated 218.2034 [M<sup>+</sup>], found 218.2037.

## Benzyl ether II

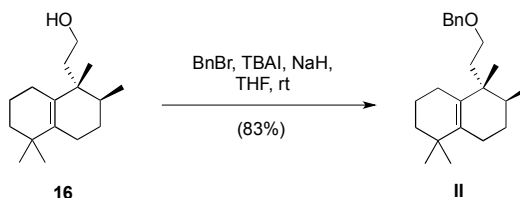

To a cooled solution of alcohol **16** (270 mg, 1.14 mmol) in anhydrous THF (3 mL) at 0 °C was added NaH (60% in dispersion oil, 60 mg, 1.37 mmol) and TBAI (4.2 mg, 0.01 mmol). The reaction was allowed to stir for 15 min, followed by the addition of BnBr (230 mg, 1.37 mmol). The reaction was allowed to warm to rt and stirred overnight, then quenched with MeOH (1 mL). The mixture was extracted with Et<sub>2</sub>O (3 × 50 mL). The organic phase were combined, dried over MgSO<sub>4</sub>, filtered and concentrated *in vacuo*. The crude product was purified by flash column chromatography (gradient elution, petrol ether/EtOAc, 100:1 → 10:1) to give benzyl ether **II** as a colourless oil (310 mg, 83%).

Data for **II**: R<sub>f</sub> 0.20 (petrol ether/EtOAc, 50:1); IR (Diamond/ZnSe): 2926, 2871, 1496, 1454, 1310 cm<sup>-1</sup>; <sup>1</sup>H NMR (600 MHz, CDCl<sub>3</sub>): δ 7.38 – 7.22 (m, 5H), 4.51 – 4.42 (m, 2H), 3.46 – 3.37 (m, 1H), 3.30 – 3.22 (dt, *J* = 9.0, 5.0 Hz, 1H), 2.05 – 1.67 (m, 6H), 1.61 – 1.32 (m, 7H), 0.96 (s, 3H), 0.91 (s, 3H), 0.86 (d, *J* = 7.0 Hz, 3H), 0.82 (s, 3H); <sup>13</sup>C NMR (150 MHz, CDCl<sub>3</sub>): δ 138.7, 136.8, 132.3, 128.3, 127.6, 127.4, 72.9, 67.4, 39.88, 39.86, 35.6, 34.6, 34.4, 29.1, 27.7, 27.2, 25.9, 25.1, 21.0, 19.9, 16.3; HRMS (C<sub>23</sub>H<sub>35</sub>O, ESI): calculated 327.2682 [M+H]<sup>+</sup>, found 327.2685.

## Alkene 19

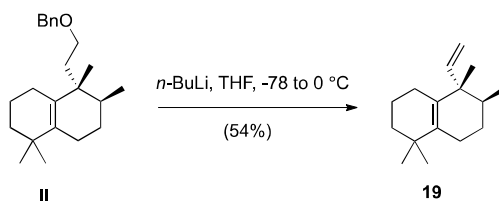

To a solution of benzyl ether **II** (1.61 g, 4.92 mmol) in anhydrous THF (50 mL) was at  $-78\text{ }^{\circ}\text{C}$  was added  $n\text{-BuLi}$  (2.5 M in hexane, 9.86 mL, 24.7 mmol) dropwise under  $\text{N}_2$  atmosphere. The reaction was allowed to stir at  $-78\text{ }^{\circ}\text{C}$  for 30 min, then warmed to  $0\text{ }^{\circ}\text{C}$  and quenched with saturated  $\text{NH}_4\text{Cl}$  solution (10 mL). The reaction mixture was extracted with  $\text{Et}_2\text{O}$  ( $3 \times 50$  mL). The organic phase were combined, washed with brine, dried over  $\text{MgSO}_4$ , filtered and concentrated *in vacuo*. The crude product was purified by flash column chromatography (neat petrol) to give alkene **19** as a colourless oil (580 mg, 54%).

Data for **19**:  $R_f$  0.80 (neat petrol);  $[\alpha]_D^{25}$  (c 1.52,  $\text{CHCl}_3$ )  $+54.1^{\circ}$ ; IR (Diamond/ $\text{ZnSe}$ ): 2923, 1631, 1459,  $1360\text{ cm}^{-1}$ ;  $^1\text{H}$  NMR (400 MHz,  $\text{CDCl}_3$ ):  $\delta$  5.55 (dd,  $J = 17.5, 10.5\text{ Hz}$ , 1H), 5.03 (dd,  $J = 10.5, 2.0\text{ Hz}$ , 1H), 4.88 (dd,  $J = 17.5, 2.0\text{ Hz}$ , 1H), 2.08 – 1.92 (m, 2H), 1.84 – 1.78 (m, 2H), 1.65 – 1.27 (m, 7H), 1.00 (s, 3H), 0.99 (s, 3H), 0.95 (s, 3H), 0.81 (d,  $J = 7.0\text{ Hz}$ , 3H);  $^{13}\text{C}$  NMR (100MHz,  $\text{CDCl}_3$ ):  $\delta$  147.9, 135.5, 131.2, 112.3, 45.0, 39.9, 37.0, 34.3, 28.6, 28.2, 27.5, 26.5, 24.0, 20.0, 17.4, 15.9; HRMS ( $\text{C}_{16}\text{H}_{26}$ , EI): calculated 218.2034  $[\text{M}^+]$ , found 218.2037.

## Diol III

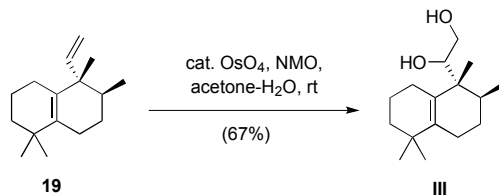

To a solution of alkene **19** (302 mg, 1.38 mmol) in acetone- $\text{H}_2\text{O}$  (9:1, 10 mL) at rt was added NMO (324 mg, 2.77 mmol) and  $\text{OsO}_4$  (18 mg, 0.07 mmol). The reaction mixture was then stirred at rt for 36 h. The mixture was then diluted with  $\text{Et}_2\text{O}$  (50 mL) and  $\text{H}_2\text{O}$  (50 mL). The organic layer was separated, and the aqueous layer was extracted with  $\text{Et}_2\text{O}$  ( $2 \times 50$  mL). The combined organics were washed with water and brine, dried over  $\text{MgSO}_4$  and concentrated *in vacuo*. The resultant residue was then purified by flash chromatography on silica gel (gradient elution, petrol ether/ $\text{EtOAc}$ , 5: 1  $\rightarrow$  2:1) to give diol **III** as a colourless oil (232 mg, 67%).

Data for **III**:  $R_f$  0.35 (petrol ether/ $\text{EtOAc}$ , 2:1);  $[\alpha]_D^{25}$  (c 1.01,  $\text{CHCl}_3$ )  $-0.9^{\circ}$ ; IR (Diamond/ $\text{ZnSe}$ ): 3387, 2924, 1459, 1016,  $1059\text{ cm}^{-1}$ ;  $^1\text{H}$  NMR (400 MHz,  $\text{CDCl}_3$ ):  $\delta$  3.60 (s, 3H), 2.10 – 1.83 (m, 6H), 1.66 – 1.62 (m, 2H), 1.57 – 1.48 (m, 2H), 1.40 – 1.37 (m, 2H), 1.25 – 1.19 (m, 1H), 0.96 (s, 3H), 0.94 (s, 3H), 0.88 (s, 3H), 0.77 (d,  $J = 7.0\text{ Hz}$ , 3H);  $^{13}\text{C}$  NMR (100 MHz,  $\text{CDCl}_3$ ):  $\delta$  141.2, 128.5, 77.9, 63.9, 44.4, 39.7, 34.9, 32.5, 29.0, 28.5, 26.9, 26.1, 22.0, 19.9, 19.6, 17.5; HRMS ( $\text{C}_{16}\text{H}_{28}\text{O}_2\text{Na}$ , ESI): calculated 275.1982  $[\text{M}+\text{Na}]^+$ , found 275.1980.

## Aldehyde **9**

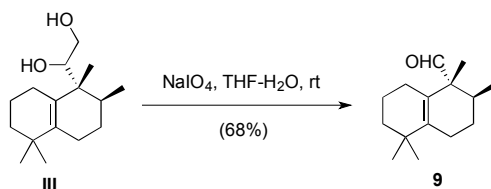

To a solution of diol **III** (670 mg, 2.66 mmol) in THF-H<sub>2</sub>O (2:1, 100 mL) was added NaIO<sub>4</sub> (1.37 g, 6.39 mmol). The reaction mixture was stirred at rt for 30 min. H<sub>2</sub>O (50 mL) and Et<sub>2</sub>O (50 mL) were then added and the organic layer was separated, dried over MgSO<sub>4</sub>, filtered and concentrated *in vacuo*. The residue was then purified by flash chromatography on silica gel (petrol ether/EtOAc, 10:1) to give aldehyde **9** (400 mg, 68%) as a colourless solid.

Data for **9**: R<sub>f</sub> 0.80 (petrol ether/EtOAc, 5:1); mp 37 – 39 °C; [α]<sub>D</sub><sup>25</sup> (c 1.80, CHCl<sub>3</sub>) +92.4°; IR (Diamond/ZnSe): 2927, 1722, 1458 cm<sup>-1</sup>; <sup>1</sup>H NMR (500 MHz, CDCl<sub>3</sub>): δ 9.17 (s, 1H), 2.04 – 2.00 (m, 2H), 1.90 – 1.85 (m, 1H), 1.82 – 1.75 (m, 1H), 1.61 – 1.27 (m, 7H), 0.95 (s, 3H), 0.93 (s, 6H), 0.69 (d, *J* = 7.0 Hz, 3H); <sup>13</sup>C NMR (125 MHz, CDCl<sub>3</sub>): δ 205.5, 138.9, 125.5, 54.5, 38.5, 33.4, 30.8, 27.7, 26.8, 26.8, 25.2, 23.8, 18.6, 15.2, 11.9; HRMS (C<sub>15</sub>H<sub>24</sub>O, EI): calculated 220.1827 [M<sup>+</sup>], found 220.1835.

## Benzylic alcohol **20**

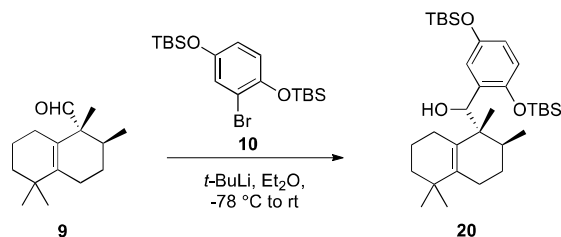

To a solution of **10**<sup>1</sup> (820 mg, 1.95 mmol) in anhydrous Et<sub>2</sub>O (6 mL) under N<sub>2</sub> atmosphere at -78 °C was added *t*-BuLi (1.7M in pentene, 1.10 mL, 1.87 mmol) dropwise. The reaction was stirred at -78 °C for 30 min and a solution of aldehyde **9** (210 mg, 0.93 mmol) in anhydrous Et<sub>2</sub>O (6 mL) was added dropwise. The resultant mixture was stirred at -78 °C for 30 min, then allowed to warm to rt. The mixture was quenched with saturated NH<sub>4</sub>Cl solution (50 mL) and extracted with Et<sub>2</sub>O (3 × 50 mL). The organic phases were combined, dried over MgSO<sub>4</sub>, filtered and concentrated *in vacuo*. The crude product was purified by flash column chromatography (gradient elution, petrol ether/EtOAc, 100:1 → 50:1 → 20:1) to give **20** (520 mg) as a mixture of diastereomers with some inseparable impurities. The crude material was then used directly in the next step without further purification.

Partial data for **20**: R<sub>f</sub> 0.60 (petrol ether/EtOAc, 20:1); IR (Diamond/ZnSe): 3508, 2956, 2929, 1253, 911, 837, 778 cm<sup>-1</sup>.

<sup>1</sup> Willis, J. P.; Gogins, K. A. Z.; Miller, L. L. *J. Org. Chem.* **1981**, *46*, 3215.



## TBS-protected hydroquinone **21**

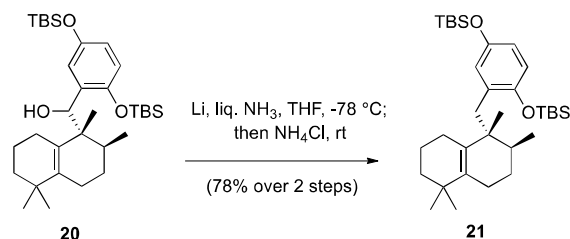

To a stirred mixture of liquid  $\text{NH}_3$  (35 mL) and anhydrous THF (18 mL) at  $-78\text{ }^\circ\text{C}$  was added Li (65 mg, 9.29 mmol). The mixture was stirred for 15 min, followed by dropwise addition of **20** (520 mg, crude from previous step) in THF (10 mL). The reaction stirred at  $-78\text{ }^\circ\text{C}$  for 15 min, then quenched with solid  $\text{NH}_4\text{Cl}$  (2.00 g) and the  $\text{NH}_3$  was allowed to evaporate over 2 h by warming to rt. The resultant mixture was diluted with  $\text{H}_2\text{O}$  (100 mL) and extracted with  $\text{Et}_2\text{O}$  ( $3 \times 50\text{ mL}$ ). The organic phases were combined, dried over  $\text{MgSO}_4$ , filtered and concentrated *in vacuo*. The crude product was purified by flash column chromatography (petrol ether/ $\text{EtOAc}$ , 50:1) to give **21** as a colourless oil (390 mg, 78% over two steps).

Data for **21**:  $R_f$  0.80 (petrol ether/ $\text{EtOAc}$ , 50:1);  $[\alpha]_D^{25}$  (c 1.89,  $\text{CHCl}_3$ )  $-3.1^\circ$ ; IR (Diamond/ $\text{ZnSe}$ ): 2927, 1489, 1211, 918, 837, 777  $\text{cm}^{-1}$ ;  $^1\text{H}$  NMR (600 MHz,  $\text{CDCl}_3$ ):  $\delta$  6.76 (d,  $J = 3.0\text{ Hz}$ , 1H), 6.60 (d,  $J = 9.0\text{ Hz}$ , 1H), 6.48 (dd,  $J = 9.0, 3.0\text{ Hz}$ , 1H), 2.87 (d,  $J = 15.5\text{ Hz}$ , 1H), 2.55 (d,  $J = 15.5\text{ Hz}$ , 1H), 2.09 – 1.92 (m, 5H), 1.71 – 1.55 (m, 5H), 1.47 – 1.45 (m, 2H), 1.38 – 1.32 (m, 2H), 1.03 (s, 3H), 1.00 (s, 9H), 0.99 (s, 3H), 0.96 (s, 9H), 0.92 (s, 3H), 0.75 (d,  $J = 7.0\text{ Hz}$ , 3H), 0.17 (d,  $J = 10.5\text{ Hz}$ , 6H), 0.14 (s, 6H);  $^{13}\text{C}$  NMR (150 MHz,  $\text{CDCl}_3$ ):  $\delta$  148.9, 148.3, 135.8, 133.0, 131.6, 122.0, 118.6, 116.9, 41.6, 39.8, 35.0, 34.4, 33.5, 28.5, 28.1, 27.1, 26.5, 26.03, 25.95, 25.8, 24.0, 22.4, 20.1, 18.3, 18.1, 16.2,  $-4.1$ ,  $-4.2$ ,  $-4.38$ ,  $-4.40$ ; HRMS ( $\text{C}_{33}\text{H}_{58}\text{O}_2\text{Si}_2\text{Na}$ , ESI): calculated 565.3868  $[\text{M}+\text{Na}]^+$ , found 565.3862.

## Hydroquinone **8**

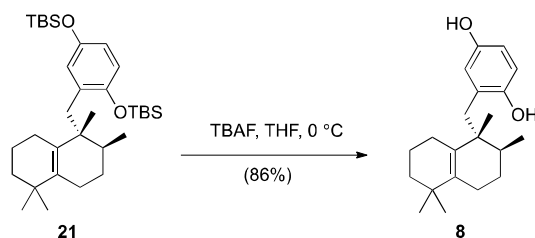

To a solution of **21** (190 mg, 0.34 mmol) in anhydrous THF (4 mL) under  $\text{N}_2$  was added TBAF (1 M in THF, 0.80 mL, 0.80 mmol) at  $0\text{ }^\circ\text{C}$ . The reaction was stirred at  $0\text{ }^\circ\text{C}$  for 20 min, then quenched with water (30 mL) and extracted with  $\text{Et}_2\text{O}$  ( $3 \times 20\text{ mL}$ ). The organic phases were combined, dried over  $\text{MgSO}_4$ , filtered and concentrated *in vacuo*. The crude product was purified by flash column chromatography (gradient elution, petrol ether/ $\text{EtOAc}$ , 10:1  $\rightarrow$  4:1  $\rightarrow$  2:1) to give **8** as a white solid (93 mg, 86%).

Data for **8**:  $R_f$  0.35 (petrol ether/ $\text{EtOAc}$ , 4:1); mp  $134 - 135\text{ }^\circ\text{C}$ ;  $[\alpha]_D^{25}$  (c 0.99,  $\text{CHCl}_3$ )  $+40.6^\circ$ ; IR (Diamond/ $\text{ZnSe}$ ): 3367, 2925, 2870, 1499, 1454, 1196, 908  $\text{cm}^{-1}$ ;  $^1\text{H}$  NMR (600 MHz,  $\text{CDCl}_3$ ):  $\delta$  6.67 (d,  $J = 8.5\text{ Hz}$ , 1H), 6.65 (d,  $J = 3.0\text{ Hz}$ , 1H), 6.55 (dd,  $J = 8.5, 3.0\text{ Hz}$ , 1H), 4.87 (s, 1H), 4.31 (s, 1H), 2.93 (d,  $J = 14.5\text{ Hz}$ , 1H), 2.50 (d,  $J = 14.5\text{ Hz}$ , 1H), 2.13 – 2.08 (m, 1H), 2.00 – 1.95 (m, 1H), 1.91 – 1.86 (m, 2H), 1.76 – 1.73 (m, 1H), 1.66 – 1.63 (m, 1H), 1.59 – 1.39 (m, 5H), 1.05 (s, 3H), 1.00 (s, 3H), 0.98 (s, 3H), 0.84 (d,  $J = 7.0\text{ Hz}$ , 3H);  $^{13}\text{C}$  NMR

(150 MHz, CDCl<sub>3</sub>):  $\delta$  148.9, 148.7, 137.8, 132.7, 127.7, 118.4, 116.5, 113.7, 41.7, 40.5, 39.6, 35.7, 34.6, 28.5, 28.1, 27.1, 26.2, 22.4, 22.3, 19.7, 15.8; HRMS (C<sub>21</sub>H<sub>30</sub>O<sub>2</sub>, EI): calculated 315.2319 [M+H]<sup>+</sup>, found 315.2310.

### (+)-Aureol **1**

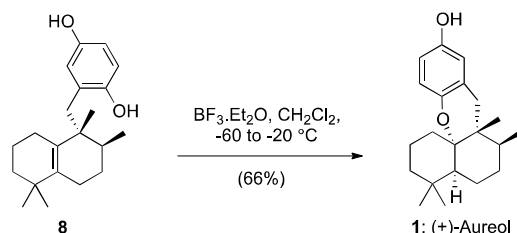

To a solution of hydroquinone **8** (79 mg, 0.25 mmol) in anhydrous CH<sub>2</sub>Cl<sub>2</sub> (25 mL) at -60 °C was added BF<sub>3</sub>·Et<sub>2</sub>O (0.14 mL, 1.13 mmol). The reaction mixture was stirred for 3 h at -60 °C, and then warmed to -20 °C and quenched with saturated NH<sub>4</sub>Cl solution. The mixture was then extracted with CH<sub>2</sub>Cl<sub>2</sub> (3 x 20 mL). The organic phases were combined, dried over MgSO<sub>4</sub>, filtered and concentrated *in vacuo*. The crude material was purified by flash column chromatography (petrol ether/EtOAc, 4:1) to give (+)-aureol **1** as a white solid (52 mg, 66%). Data for **1**: R<sub>f</sub> 0.50 (petrol ether/EtOAc, 4:1); mp 143 – 144 °C [lit. mp 144 – 145 °C]; [ $\alpha$ ]<sub>D</sub><sup>25</sup> (c 0.84, CHCl<sub>3</sub>) +52.3°; IR (Diamond/ZnSe): 3298, 2935, 2870, 1495, 1450, 952 cm<sup>-1</sup>; <sup>1</sup>H NMR (600 MHz, CDCl<sub>3</sub>):  $\delta$  6.60 (d, *J* = 9.0 Hz, 1H), 6.56 (dd, *J* = 9.0, 3.0 Hz, 1H), 6.49 (d, *J* = 3.0 Hz, 1H), 4.31 (br s, 1H), 3.37 (d, *J* = 17.0 Hz, 1H), 2.11 – 1.99 (m, 2H), 1.97 (d, *J* = 17.0 Hz, 1H), 1.84 – 1.76 (m, 2H), 1.71 – 1.64 (m, 2H), 1.60 – 1.52 (m, 1H), 1.49 – 1.33 (m, 5H), 1.11 (d, *J* = 7.5 Hz, 3H), 1.06 (s, 3H), 0.92 (s, 3H), 0.78 (s, 3H); <sup>13</sup>C NMR (150 MHz, CDCl<sub>3</sub>):  $\delta$  148.3, 145.8, 122.2, 117.3, 115.1, 114.0, 82.4, 44.0, 39.3, 38.1, 37.4, 33.9, 33.8, 31.9, 29.8, 29.3, 27.9, 22.2, 20.2, 18.4, 17.3; HRMS (C<sub>21</sub>H<sub>30</sub>O<sub>2</sub>, EI): calculated 315.2319 [M+H]<sup>+</sup>, found 315.2312.

### Cyclic ether **22**

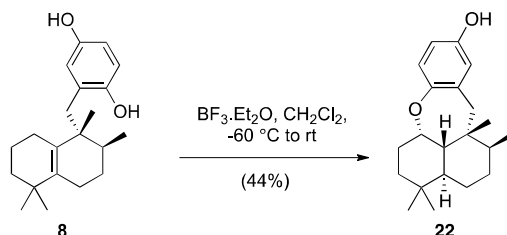

To a solution of hydroquinone **8** (61 mg, 0.19 mmol) in anhydrous CH<sub>2</sub>Cl<sub>2</sub> (20 mL) at -60 °C was added BF<sub>3</sub>·Et<sub>2</sub>O (0.10 mL, 0.81 mmol). The reaction was stirred for 3 h at -60 °C, and then warmed to rt for 10 min. The reaction mixture was quenched with saturated NH<sub>4</sub>Cl solution (30 mL) and extracted with CH<sub>2</sub>Cl<sub>2</sub> (3 x 20 mL). The organic phases were combined, dried over MgSO<sub>4</sub>, filtered and concentrated *in vacuo*. The crude material was purified by flash column chromatography (petrol ether/EtOAc, 4:1) to give ether **22** as a white solid (27 mg, 44%).

Data for **22**: R<sub>f</sub> 0.50 (petrol ether/EtOAc, 4:1); mp 189 – 191 °C; [ $\alpha$ ]<sub>D</sub><sup>25</sup> (c 0.66, CHCl<sub>3</sub>) -3.0°; IR (Diamond/ZnSe): 3390, 2942, 2909, 2869, 1606, 1501, 1449, 1368 cm<sup>-1</sup>; <sup>1</sup>H NMR (600

MHz, CDCl<sub>3</sub>):  $\delta$  6.77 (d,  $J$  = 8.5 Hz, 1H), 6.52 (dd,  $J$  = 8.5, 3.0 Hz, 1H), 6.48 (d,  $J$  = 3.0 Hz, 1H), 4.37 (s, 1H), 3.88 (br s, 1H), 3.81 (d,  $J$  = 14.0 Hz, 1H), 2.03 (dt,  $J$  = 12.0, 4.0 Hz, 1H), 1.95 – 1.89 (m, 2H), 1.84 (dt,  $J$  = 14.0, 4.0 Hz, 1H), 1.79 (d,  $J$  = 14.0 Hz, 1H), 1.63 – 1.57 (m, 2H), 1.53 – 1.51 (m, 1H), 1.49 (d,  $J$  = 12.0 Hz, 1H), 1.38 – 1.33 (m, 1H), 1.30 (dd,  $J$  = 13.0, 4.0 Hz, 1H), 1.19 (dt,  $J$  = 10.0, 3.0 Hz, 1H), 0.97 (s, 3H), 0.95 (overlapped d, 3H), 0.89 (s, 3H), 0.72 (s, 3H); <sup>13</sup>C NMR (150 MHz, CDCl<sub>3</sub>):  $\delta$  153.1, 151.0, 136.1, 121.3, 117.6, 113.1, 76.3, 43.2, 42.8, 41.9, 39.1, 35.9, 35.8, 33.3, 30.5, 30.0, 27.8, 24.4, 19.7, 19.6, 15.2.

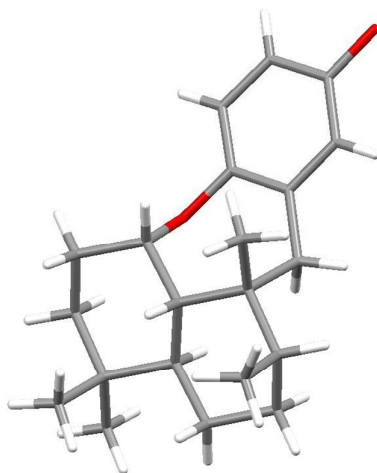

X-ray crystal structure of **22**

<sup>1</sup>H spectrum  
CDCl<sub>3</sub>  
400 MHz

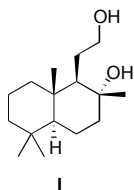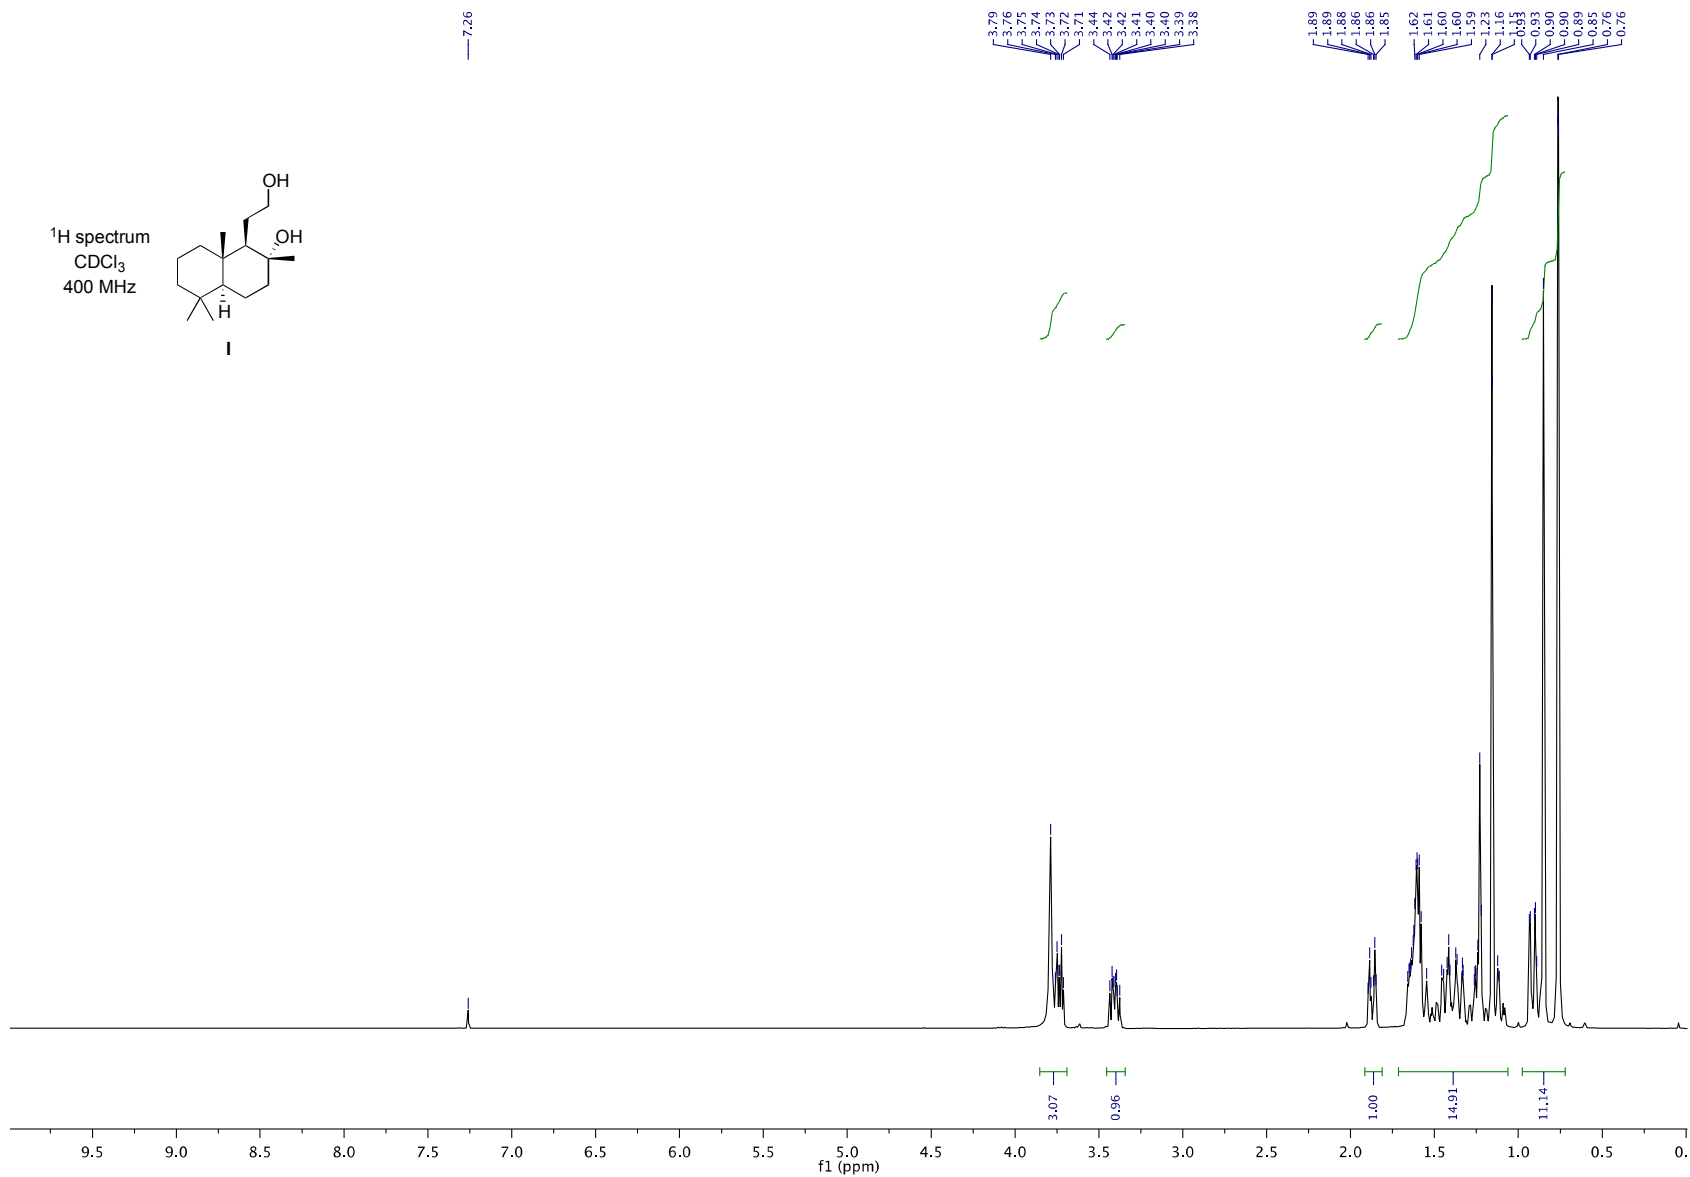

<sup>13</sup>C spectrum  
CDCl<sub>3</sub>  
100 MHz

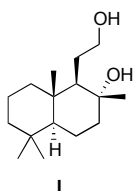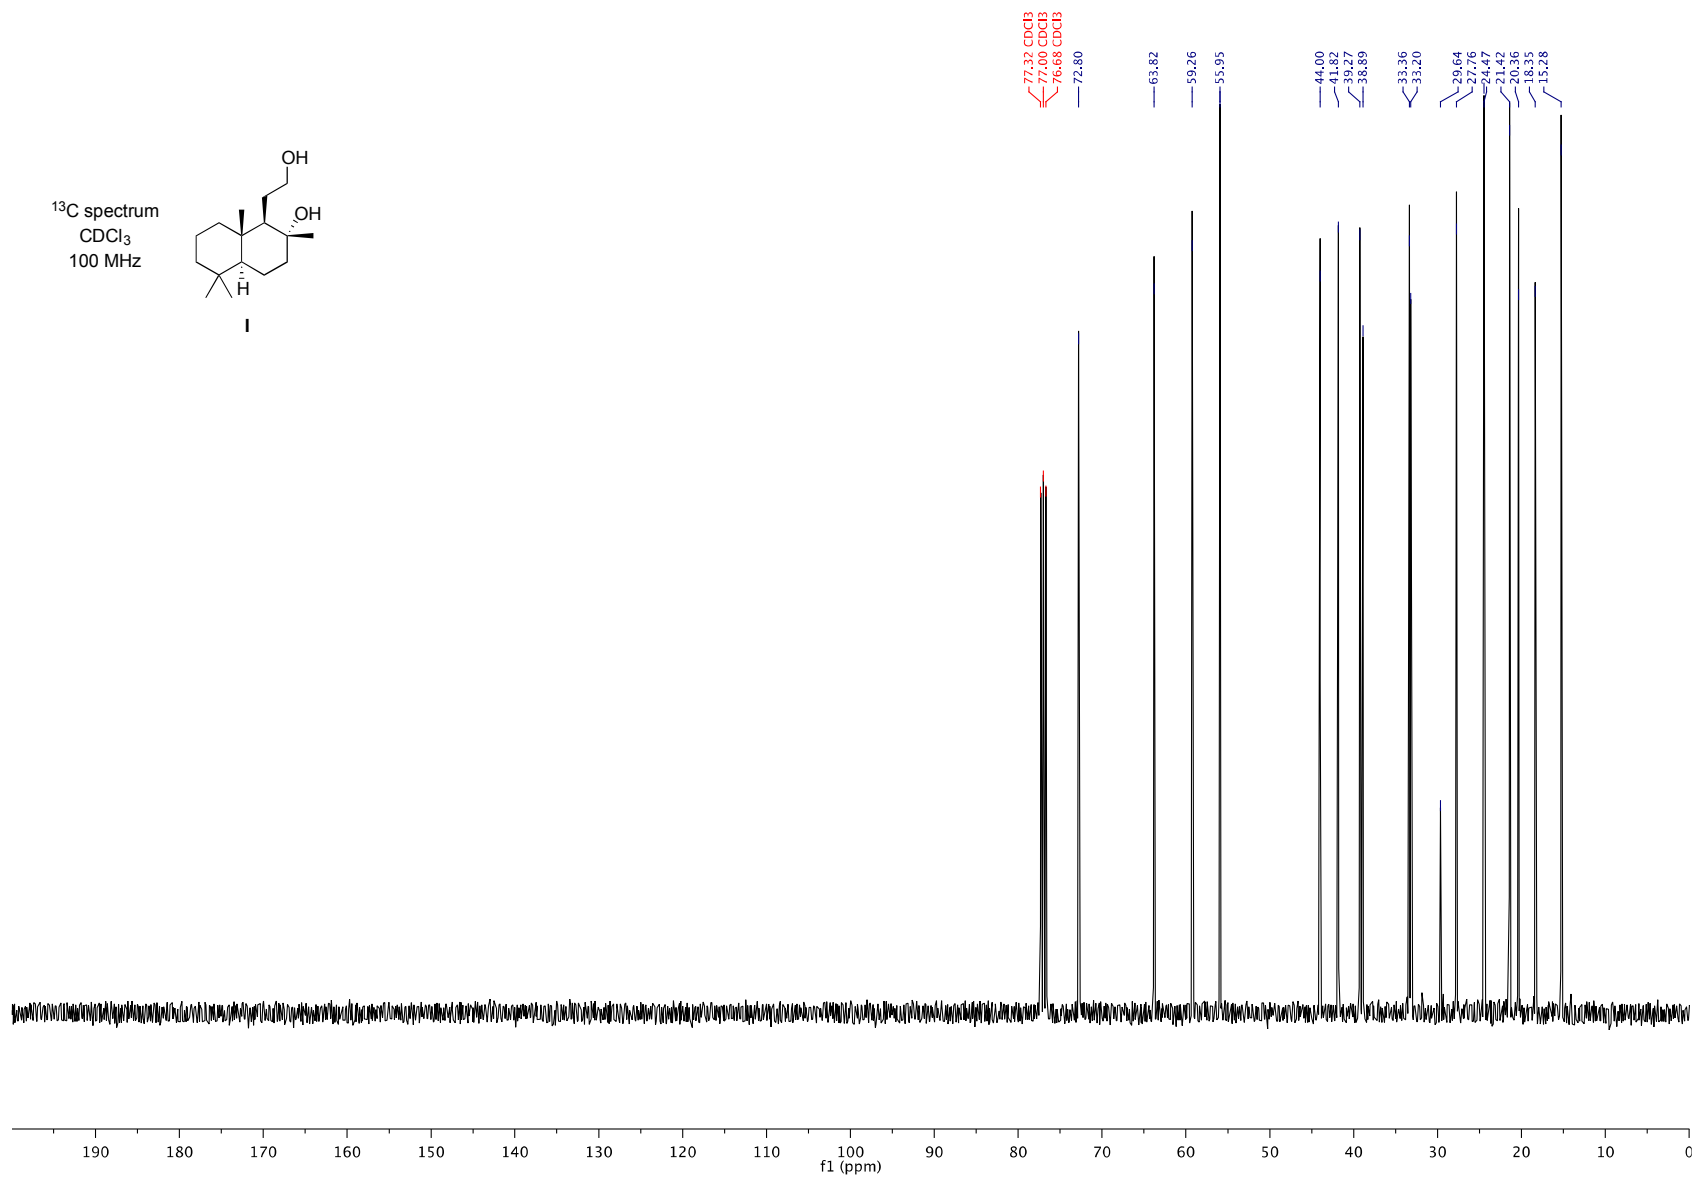

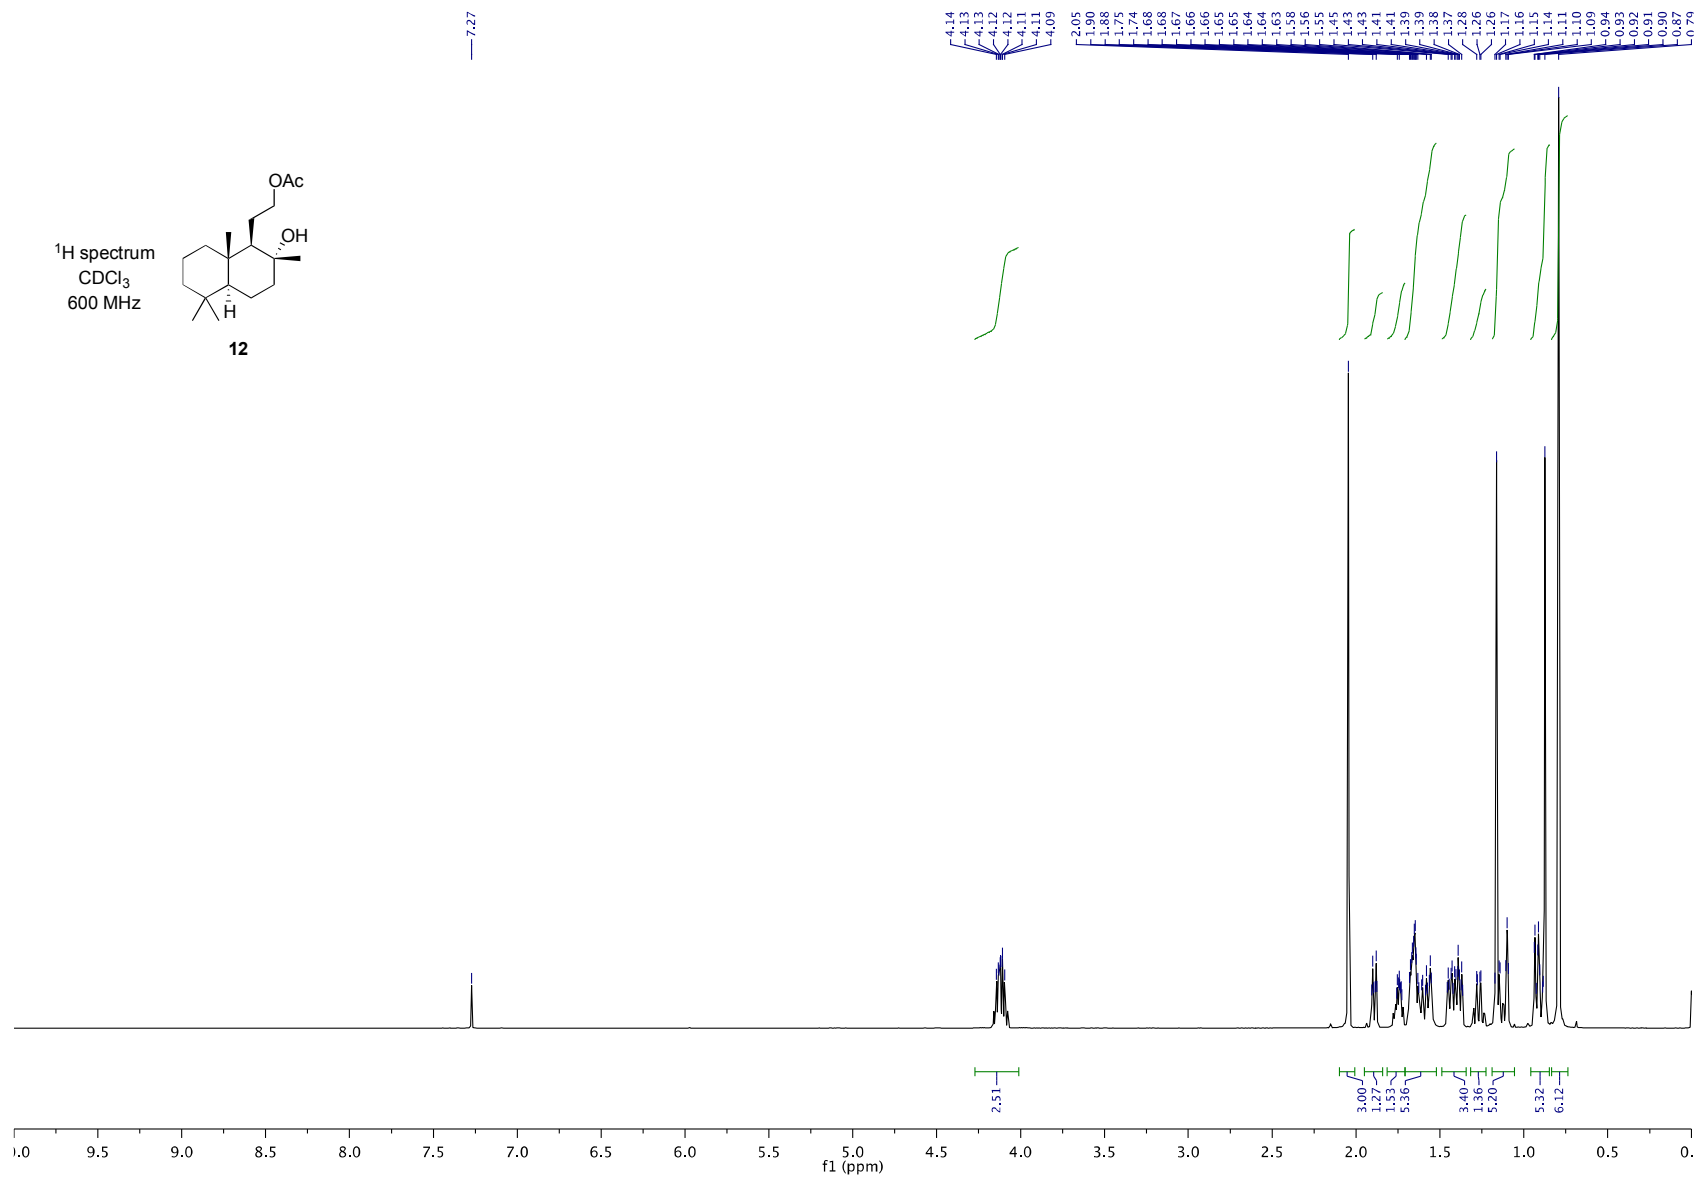

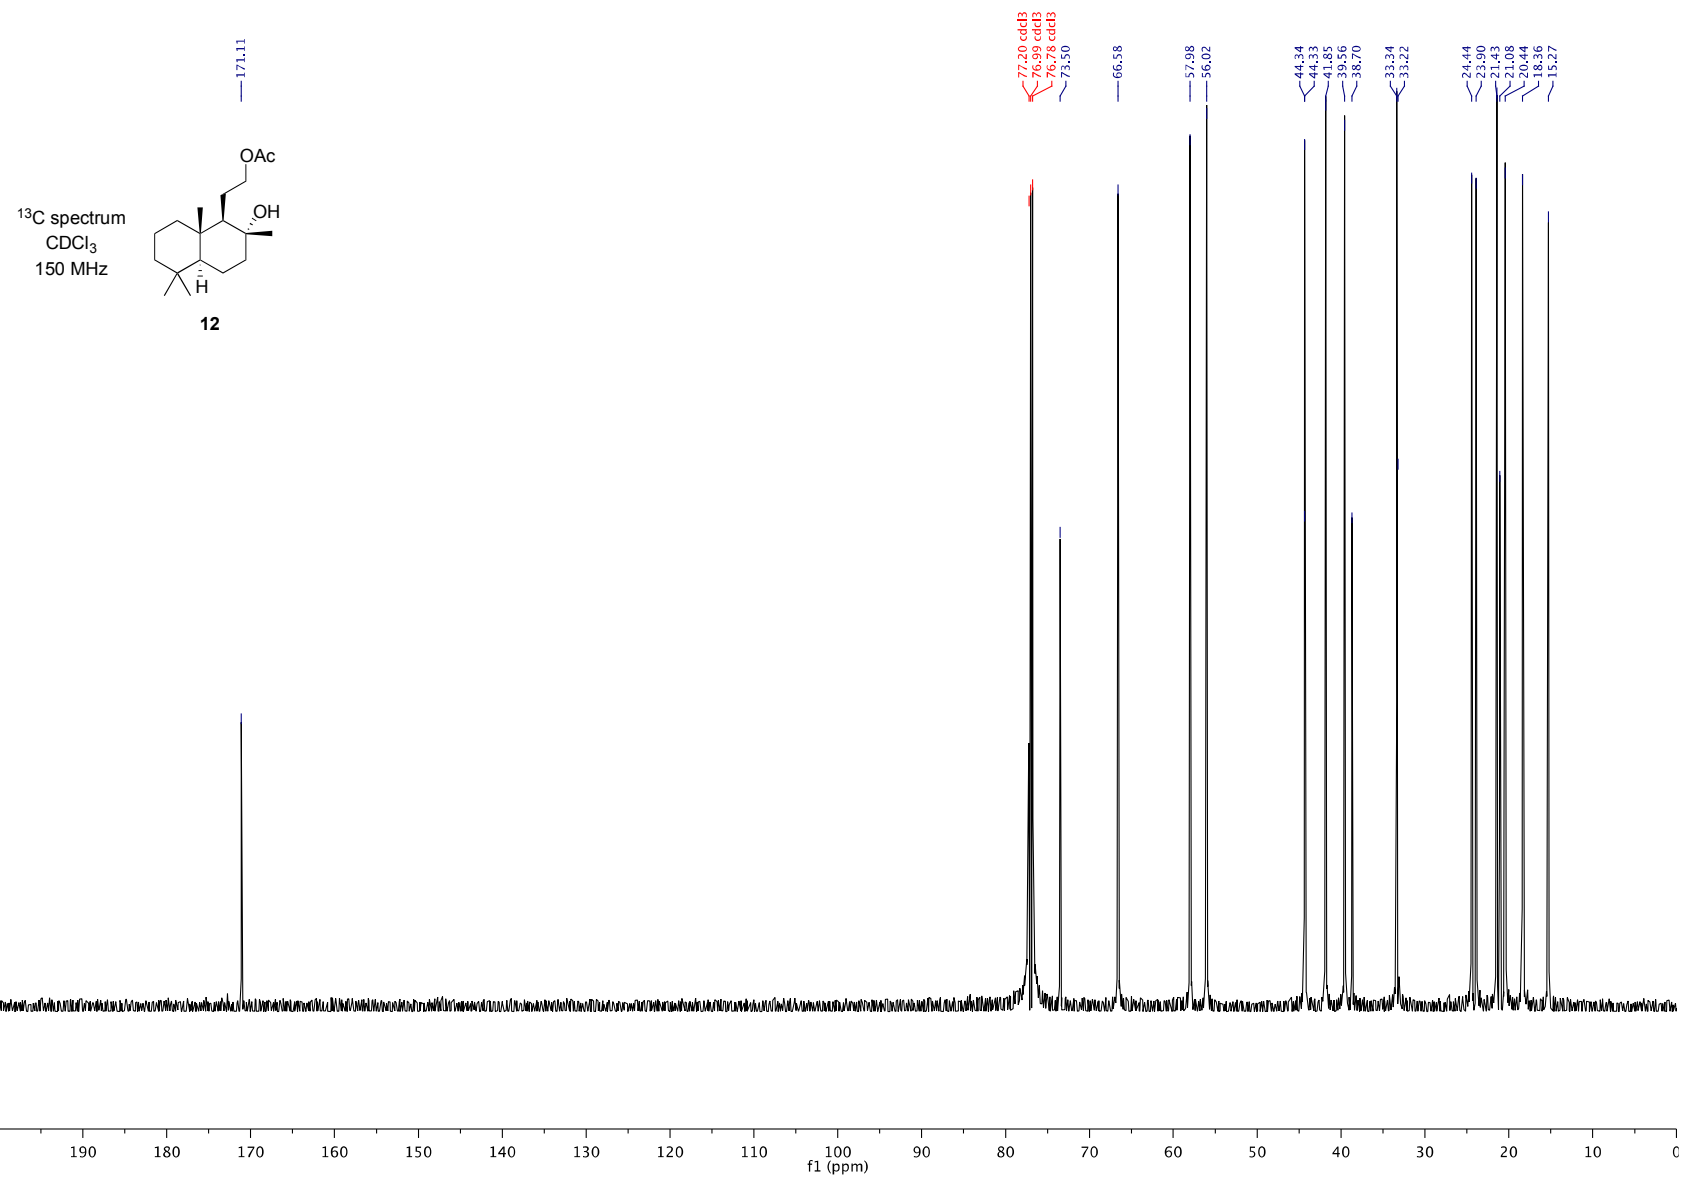

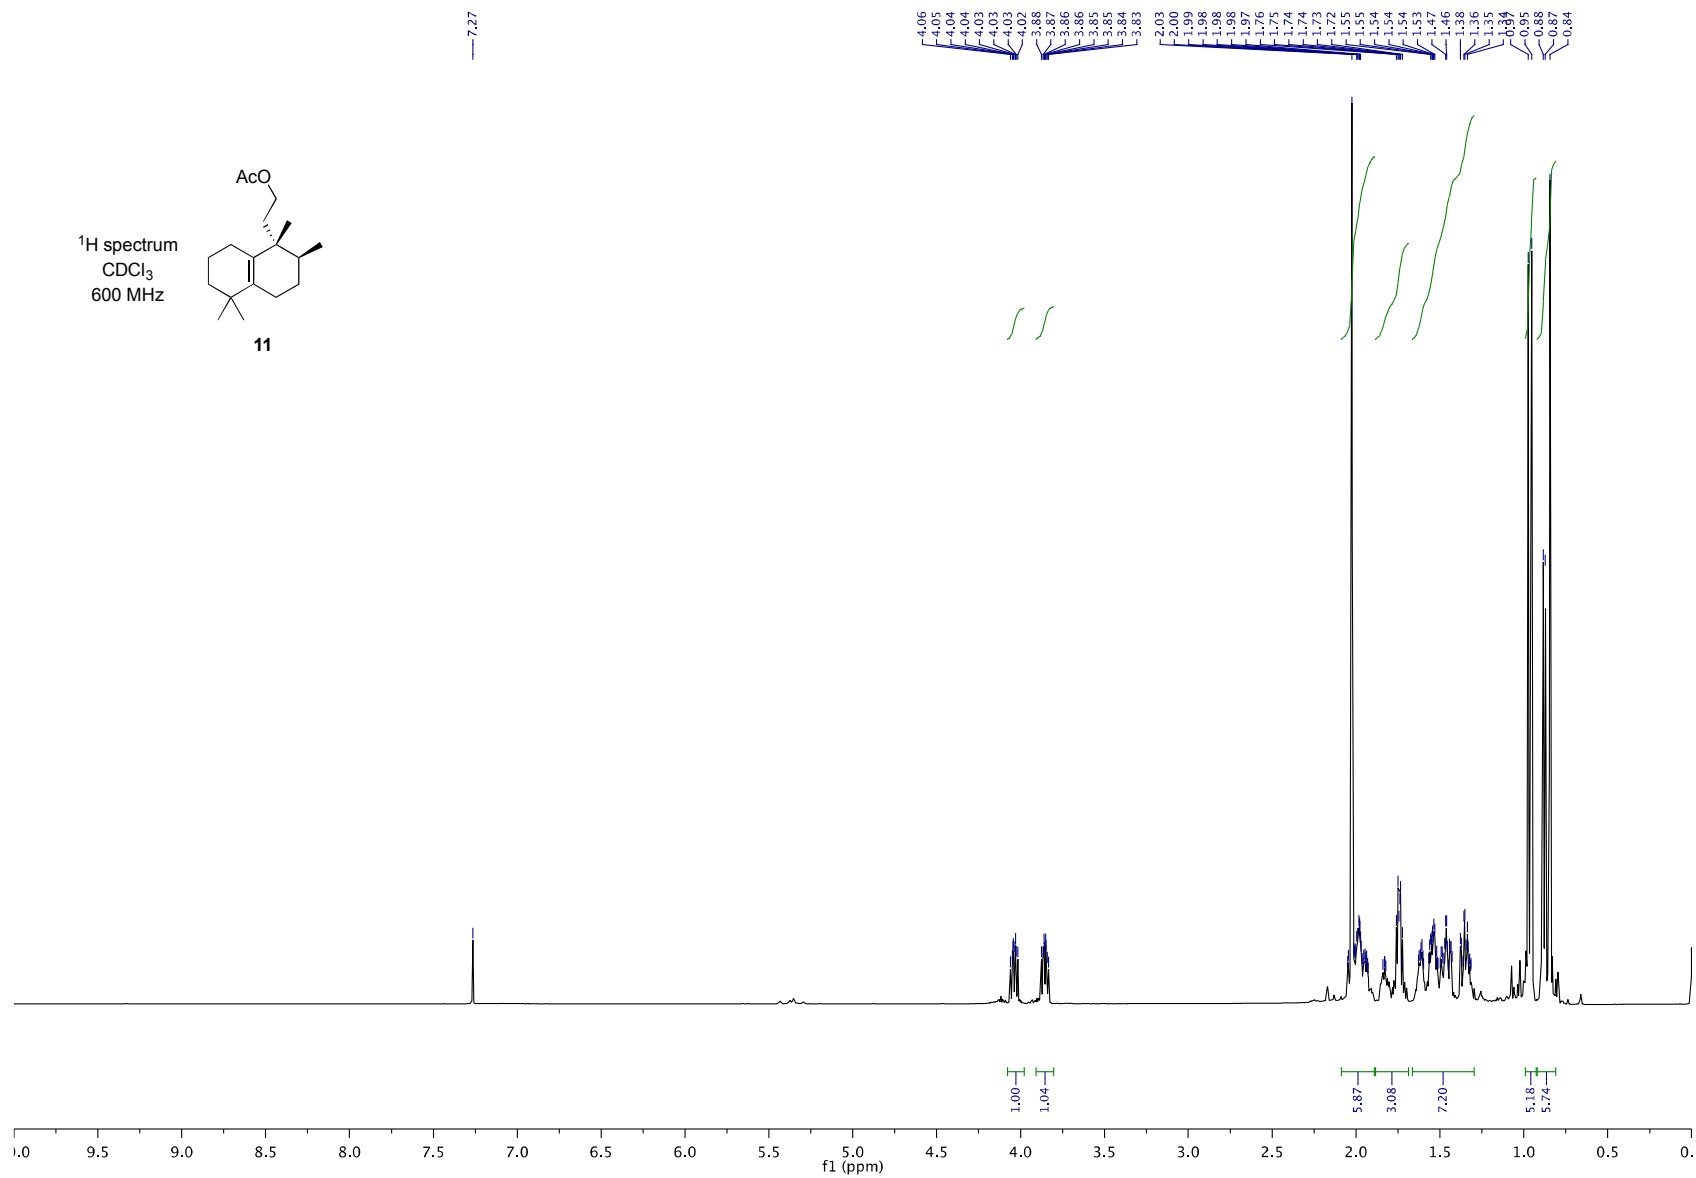



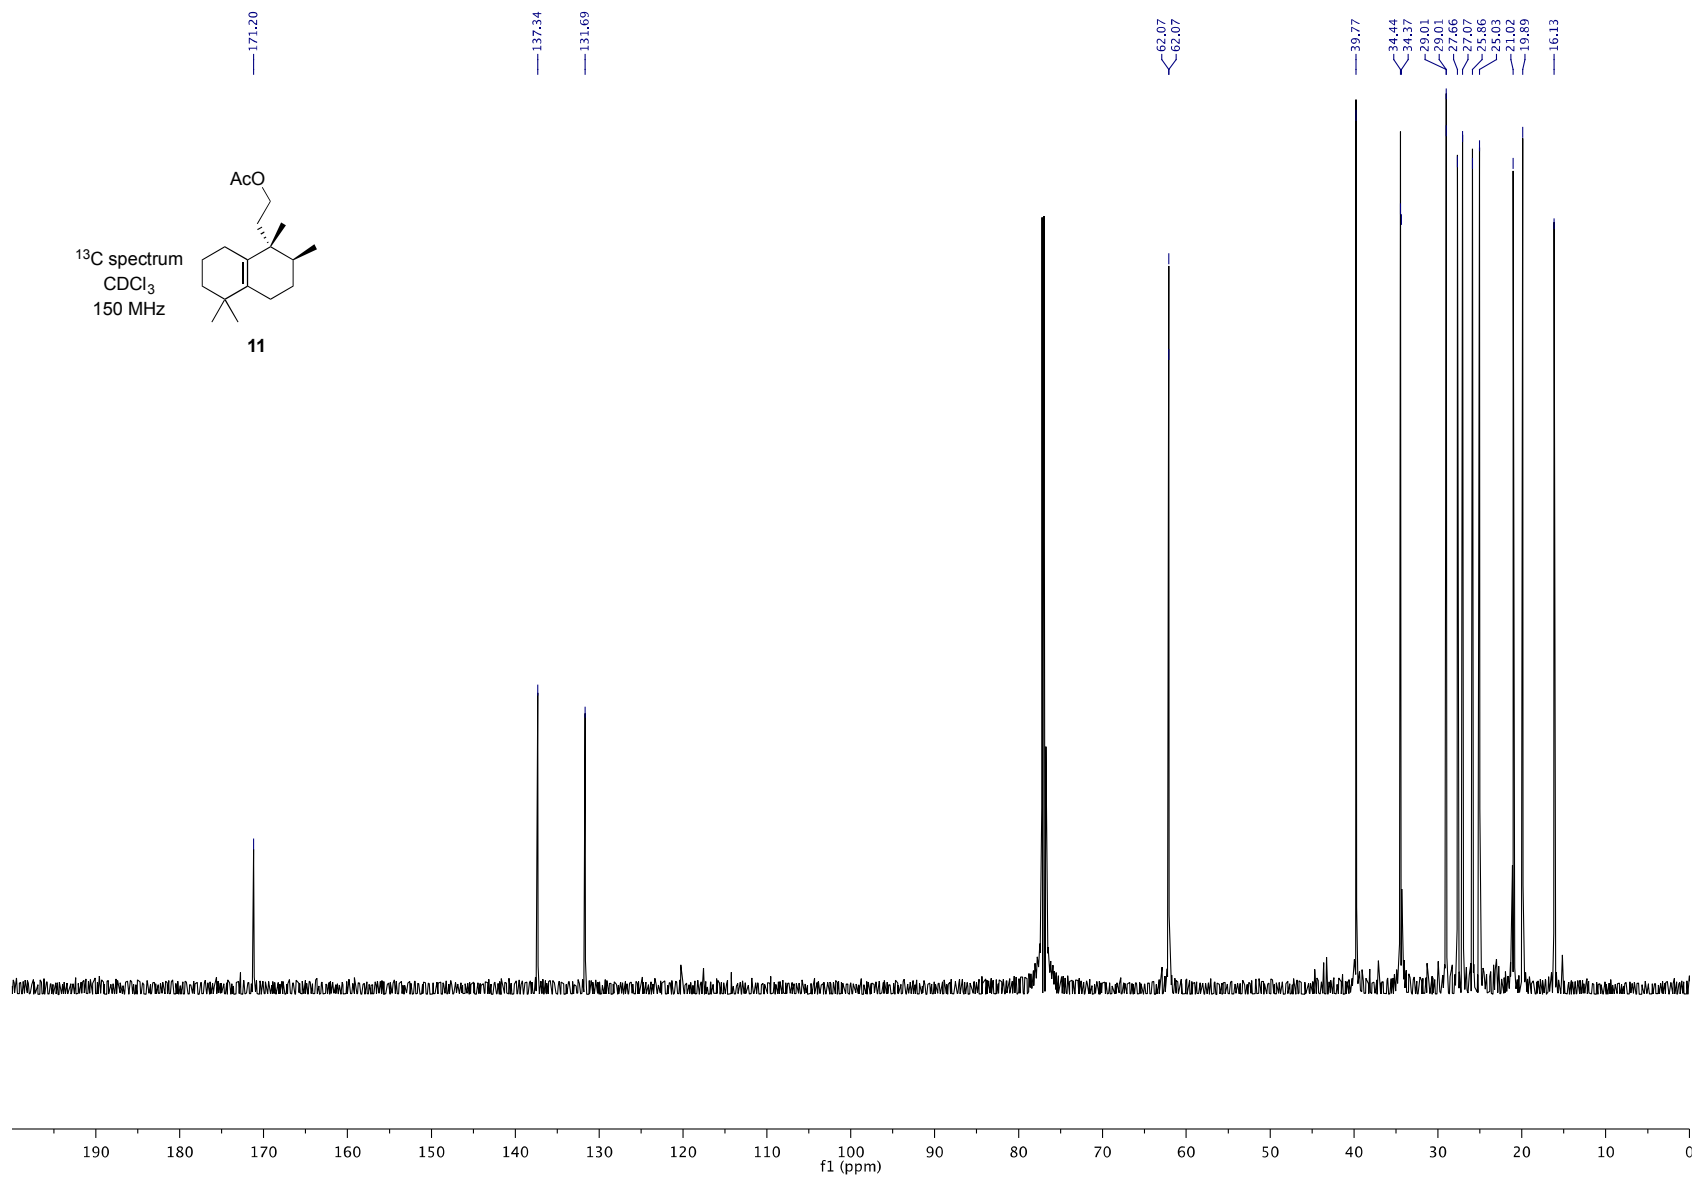

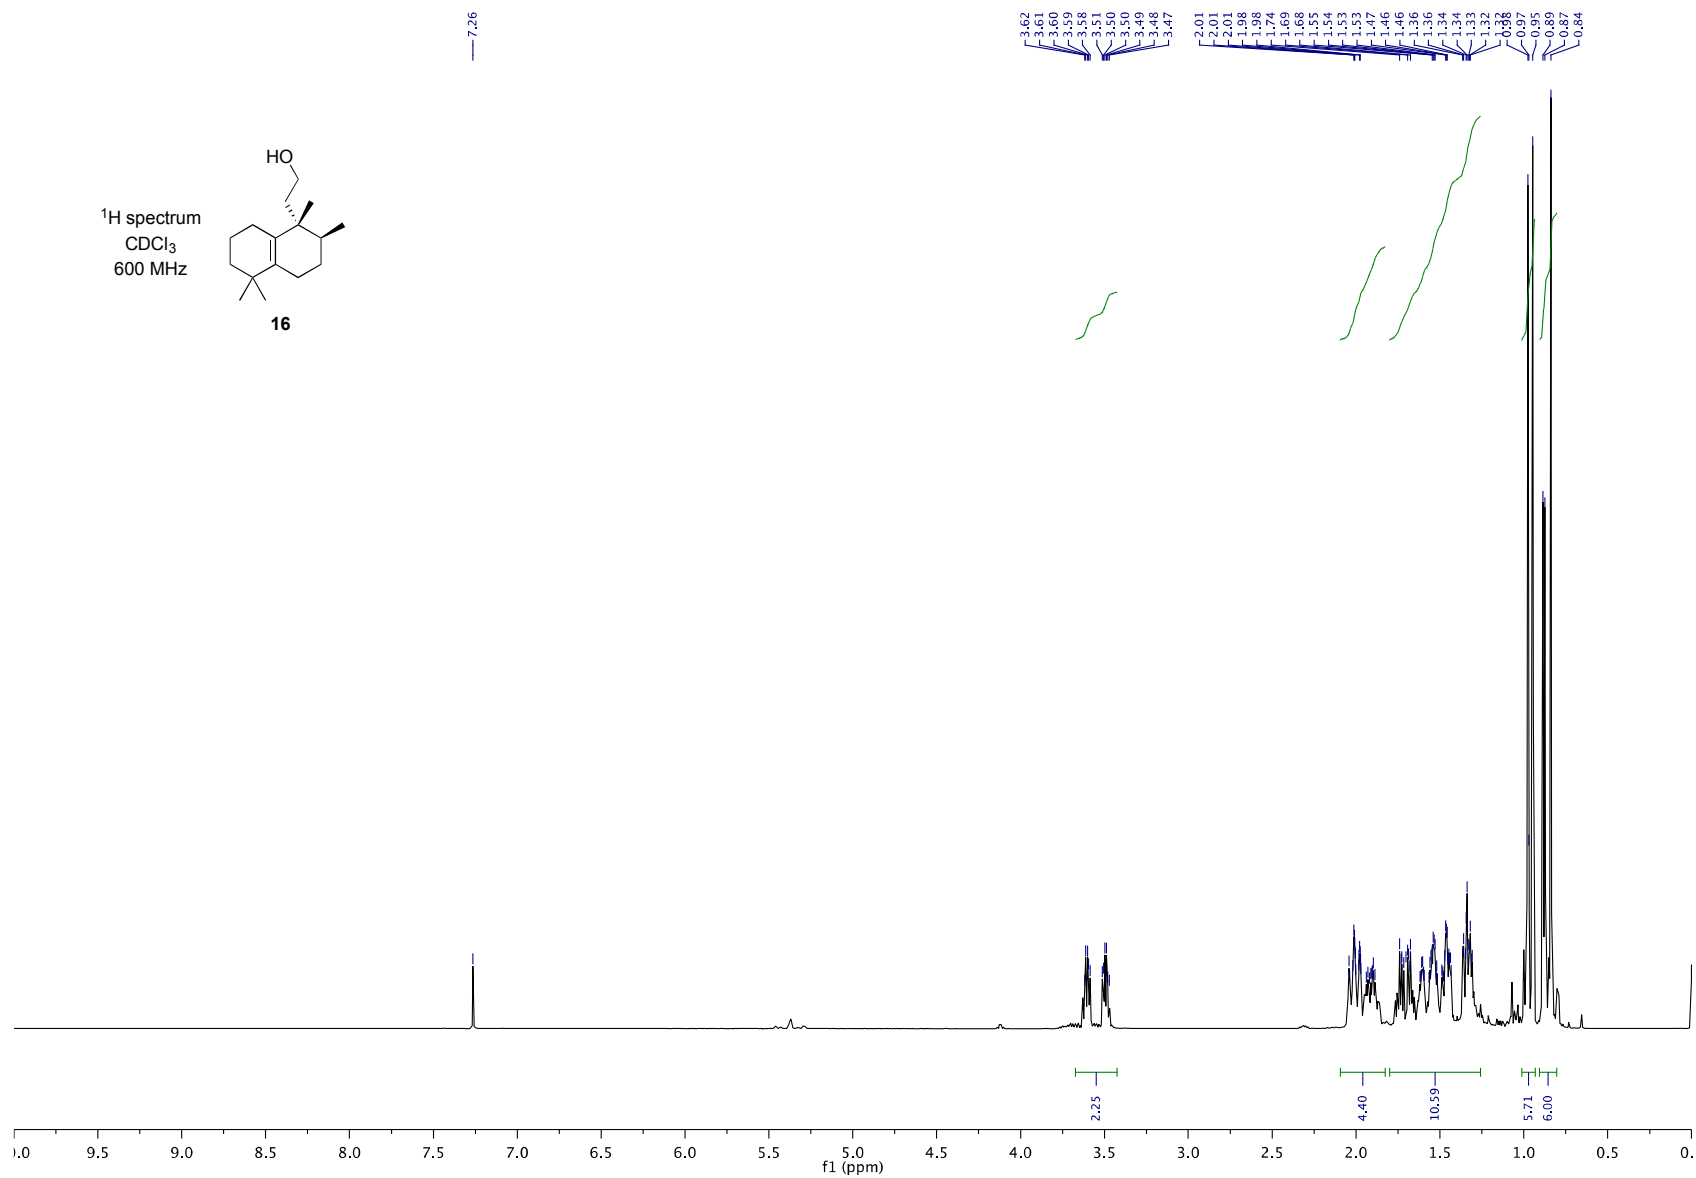

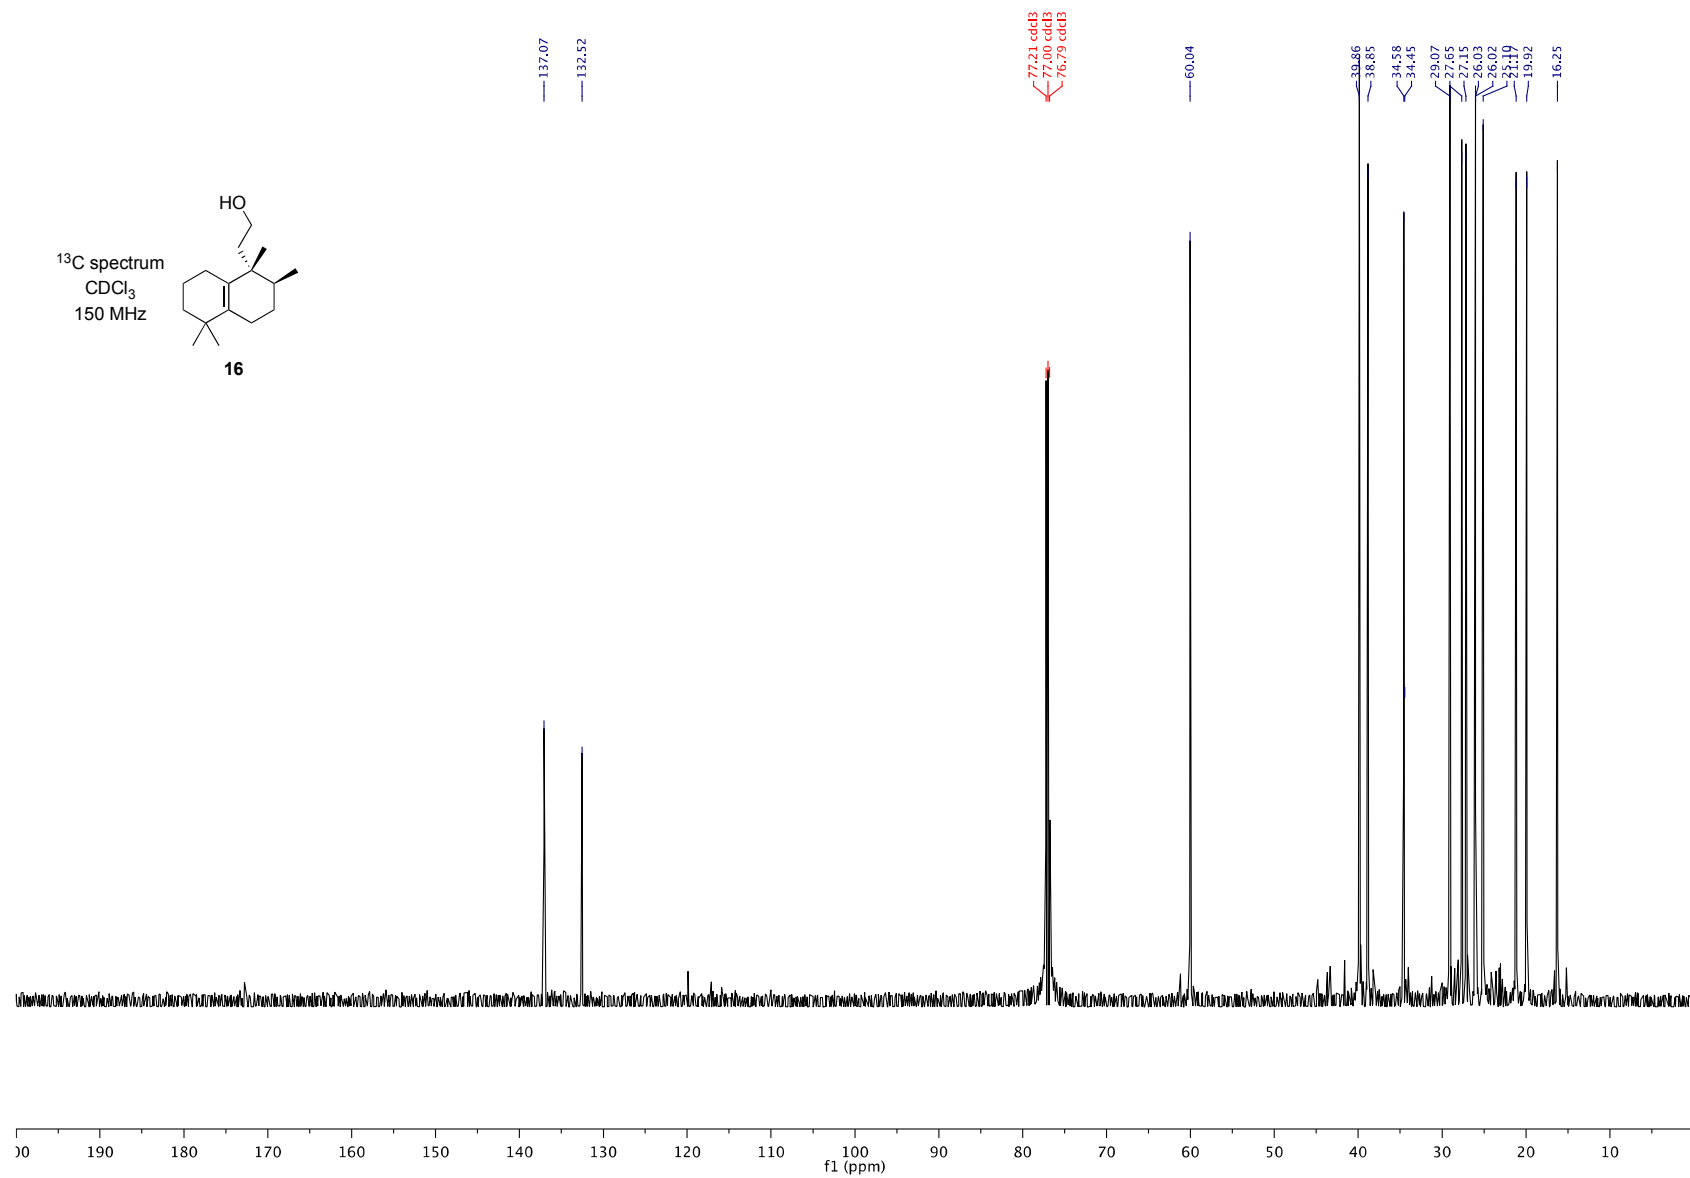

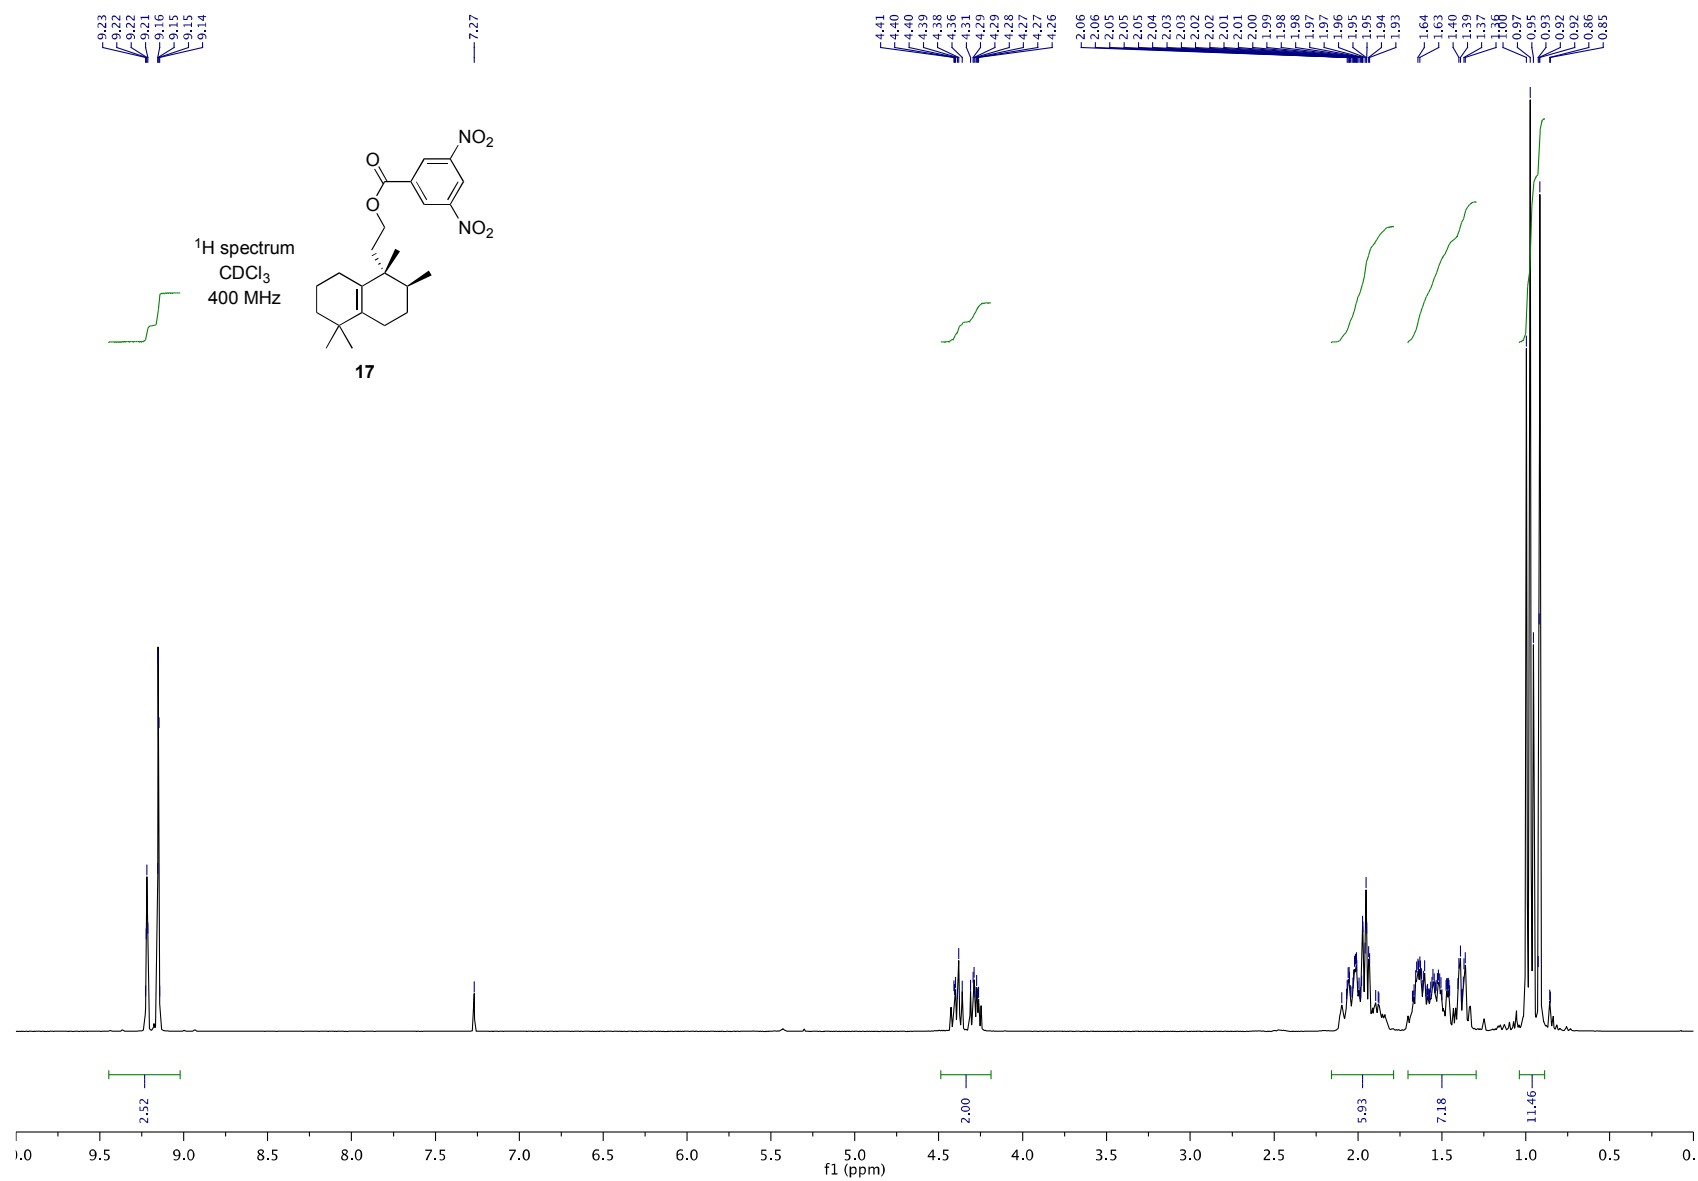

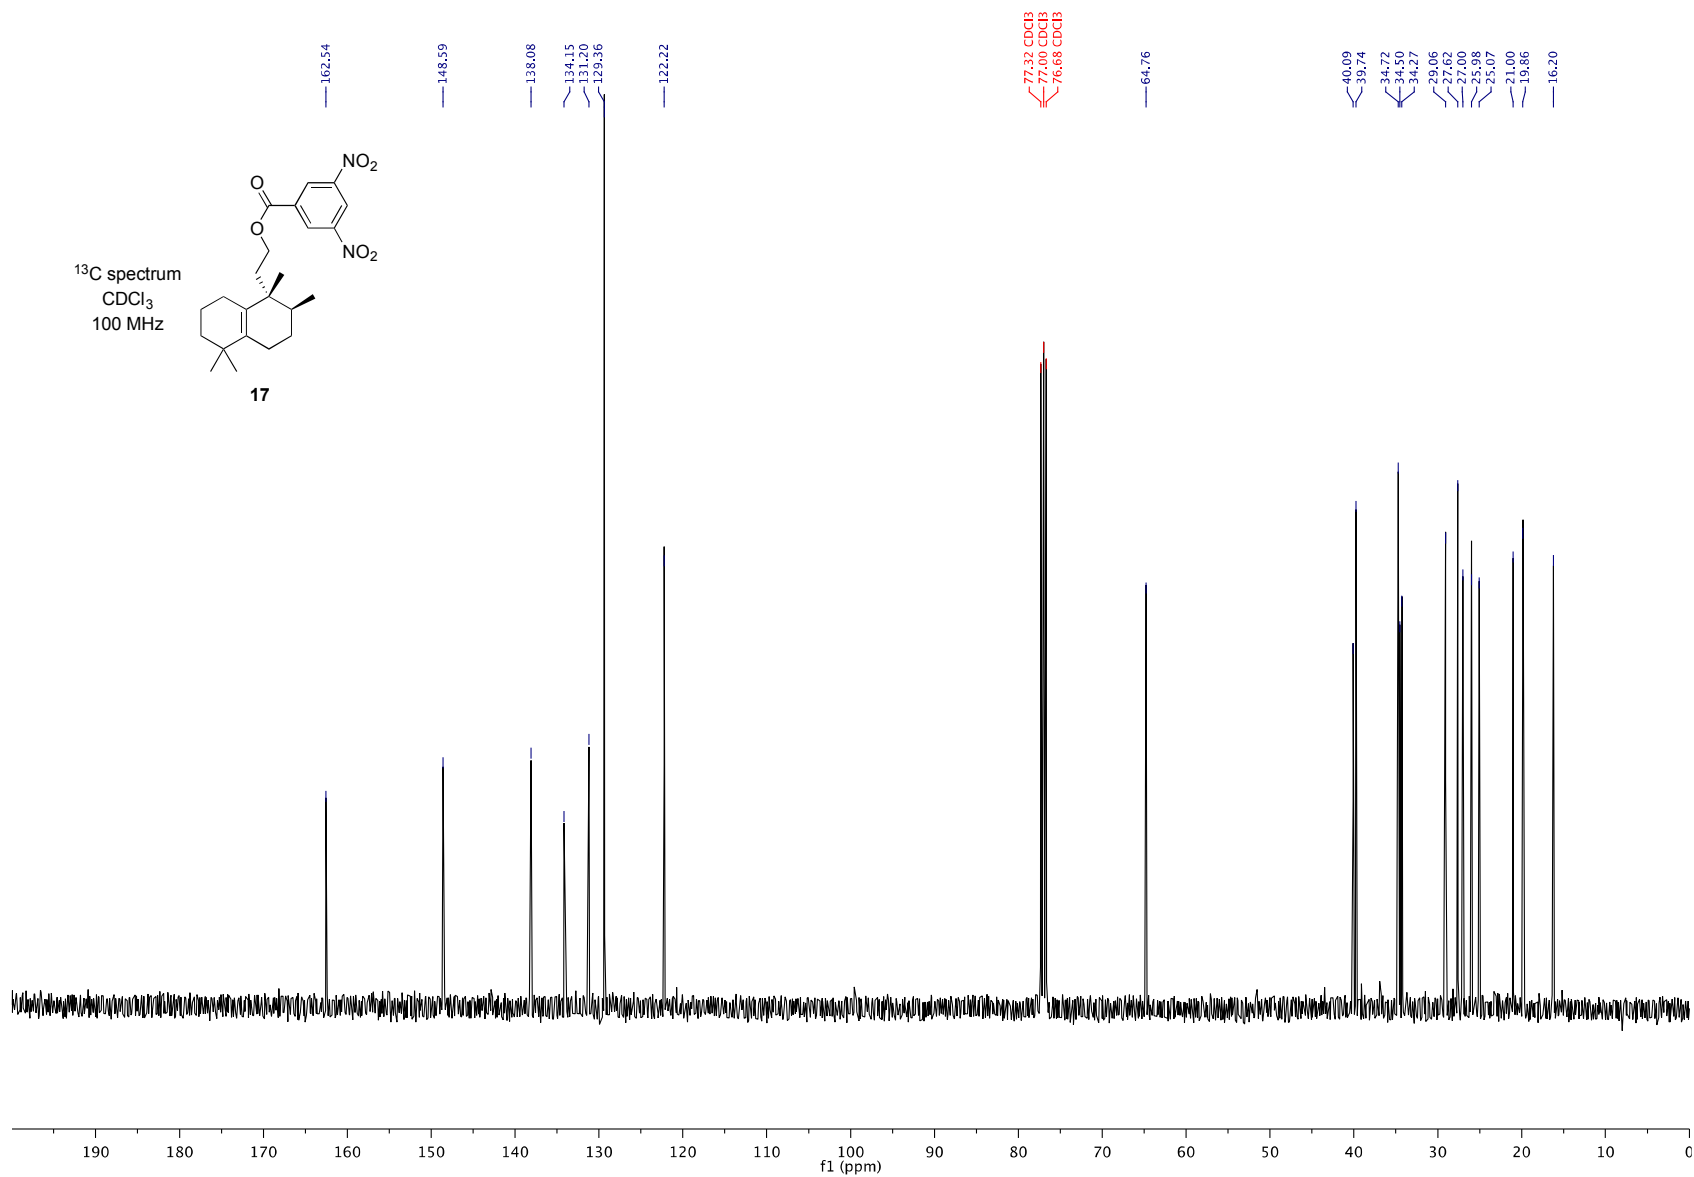

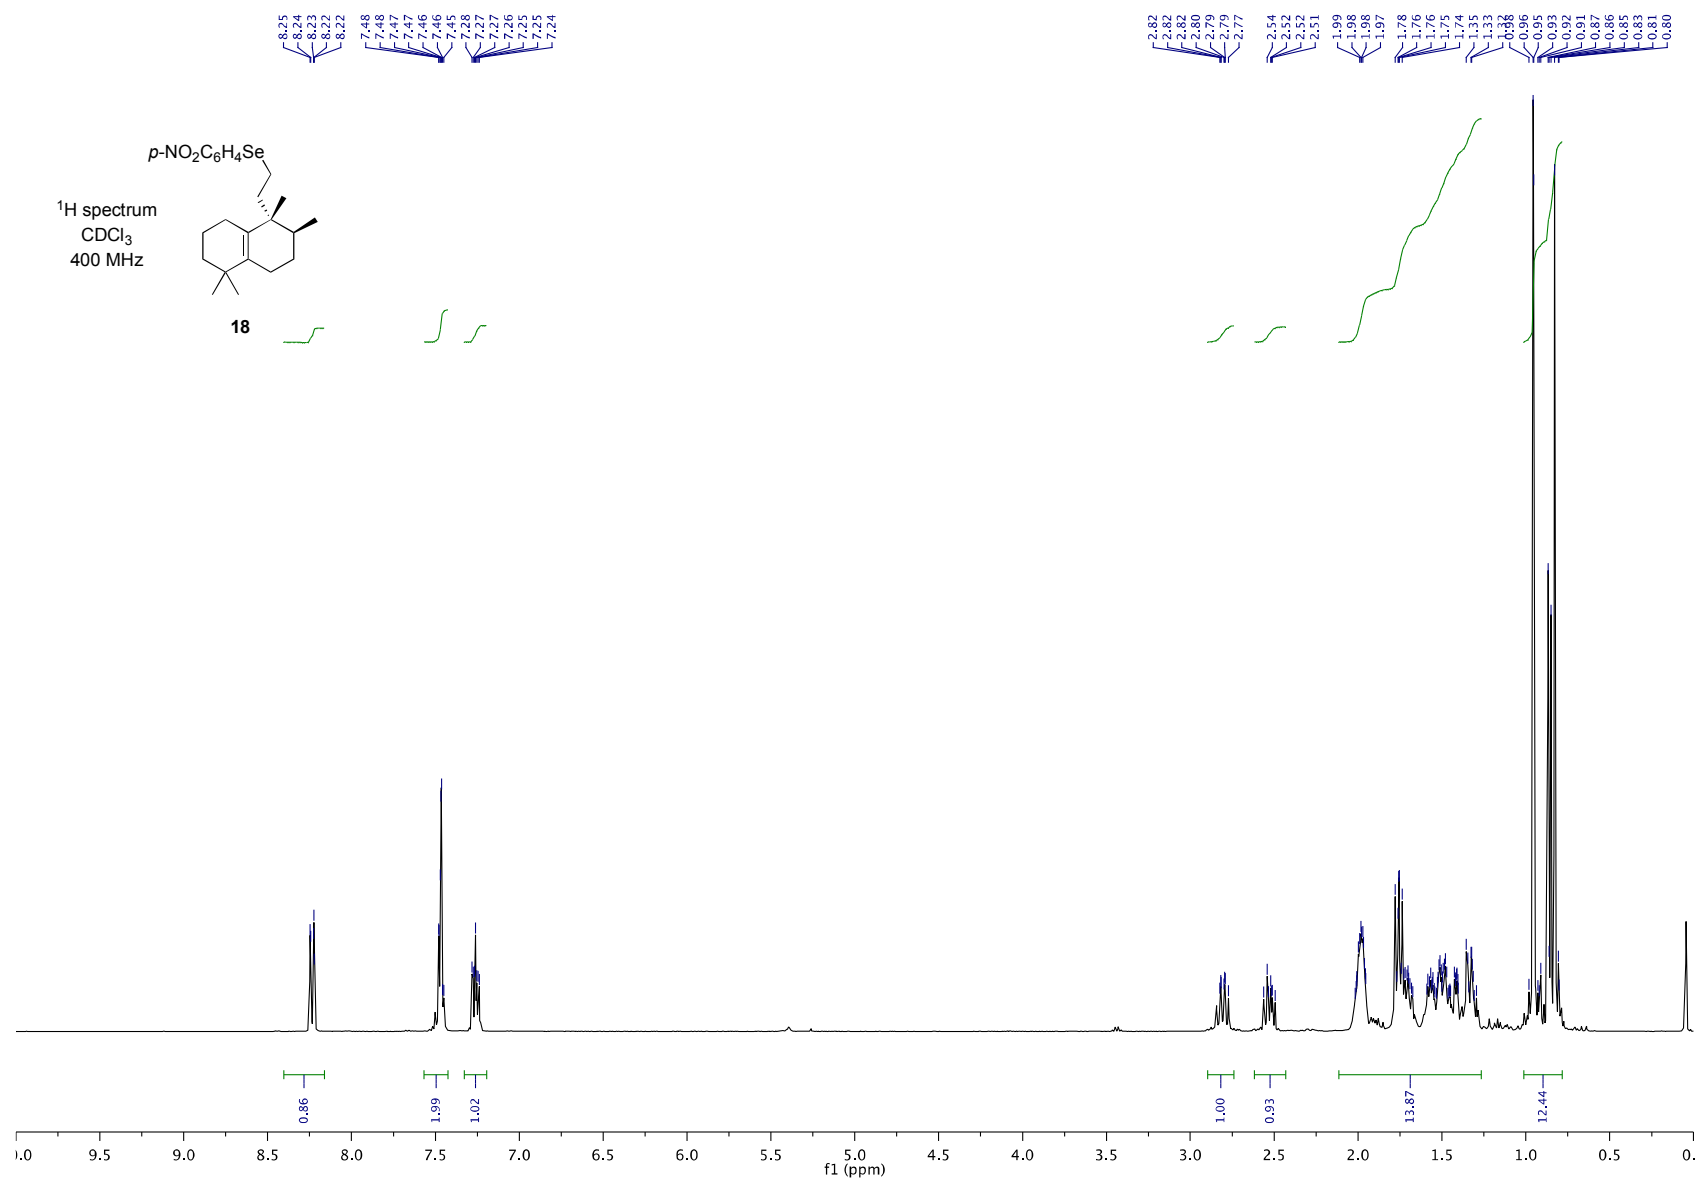

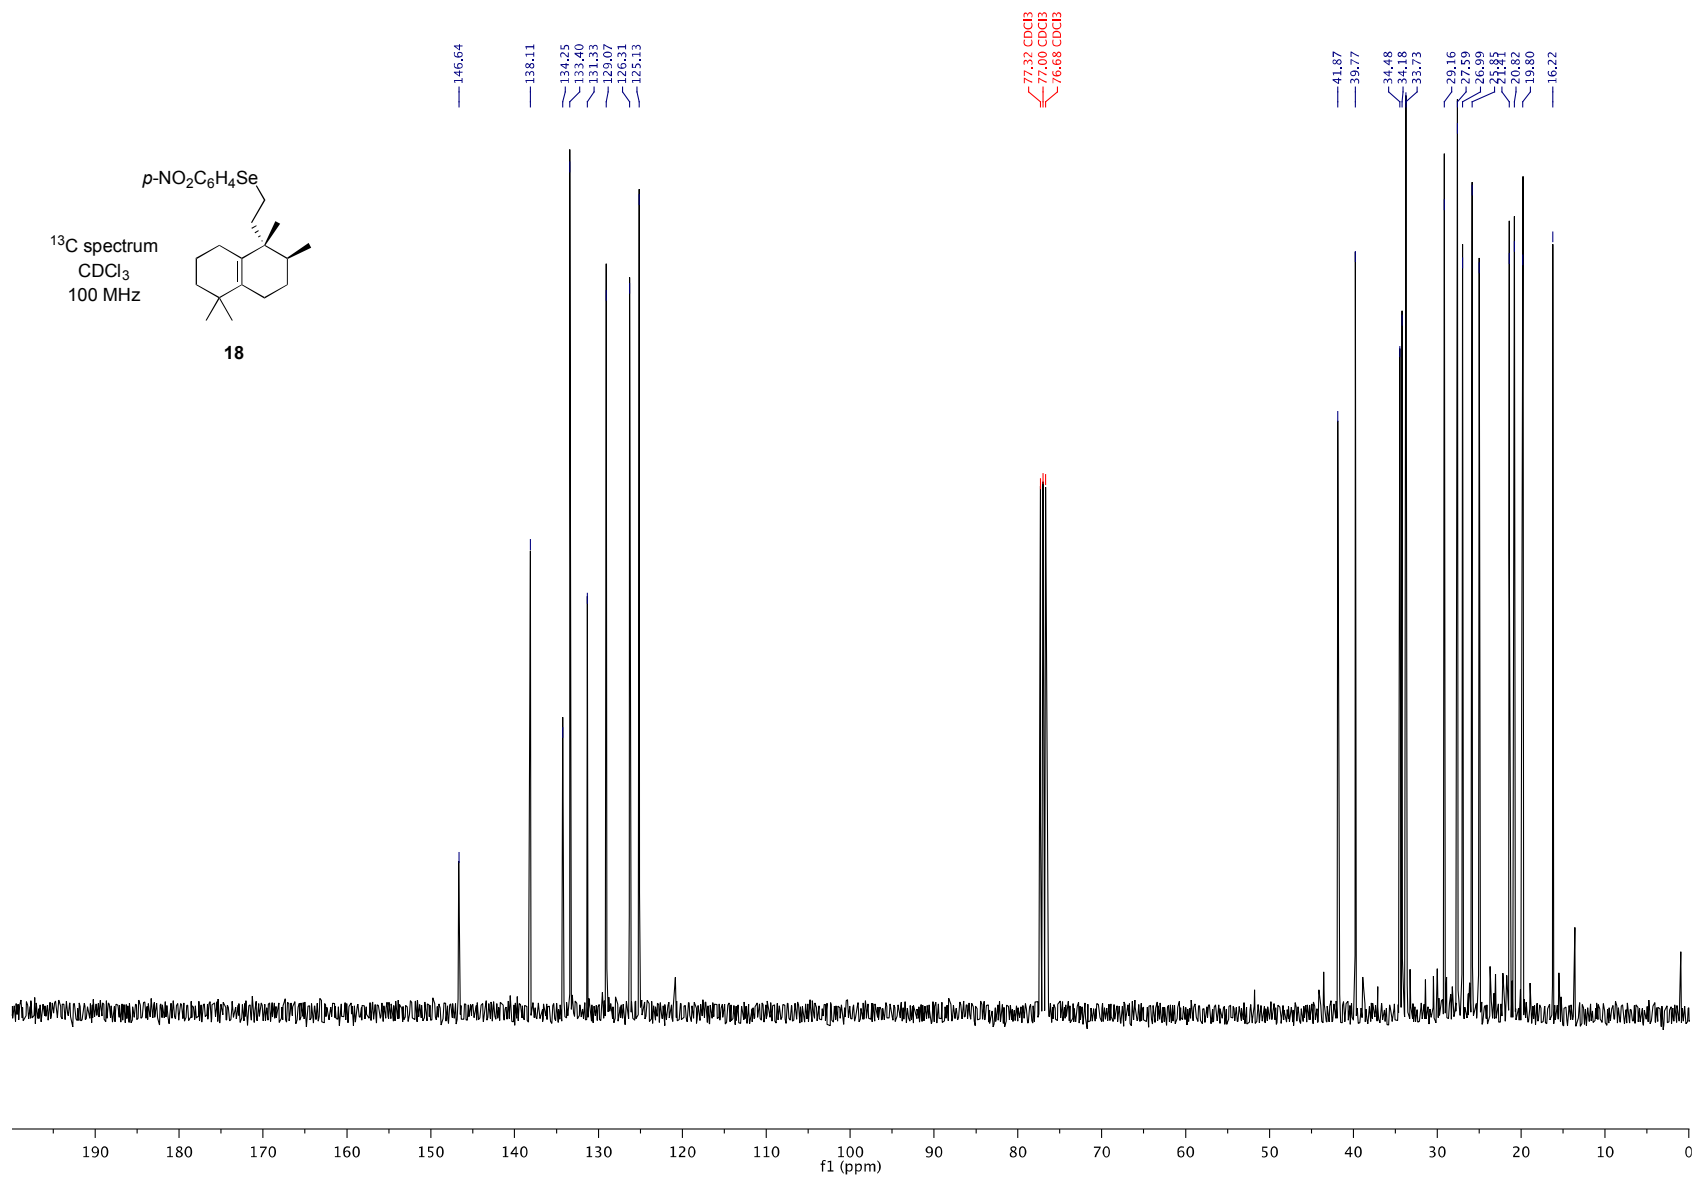

<sup>1</sup>H spectrum  
CDCl<sub>3</sub>  
400 MHz

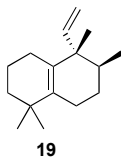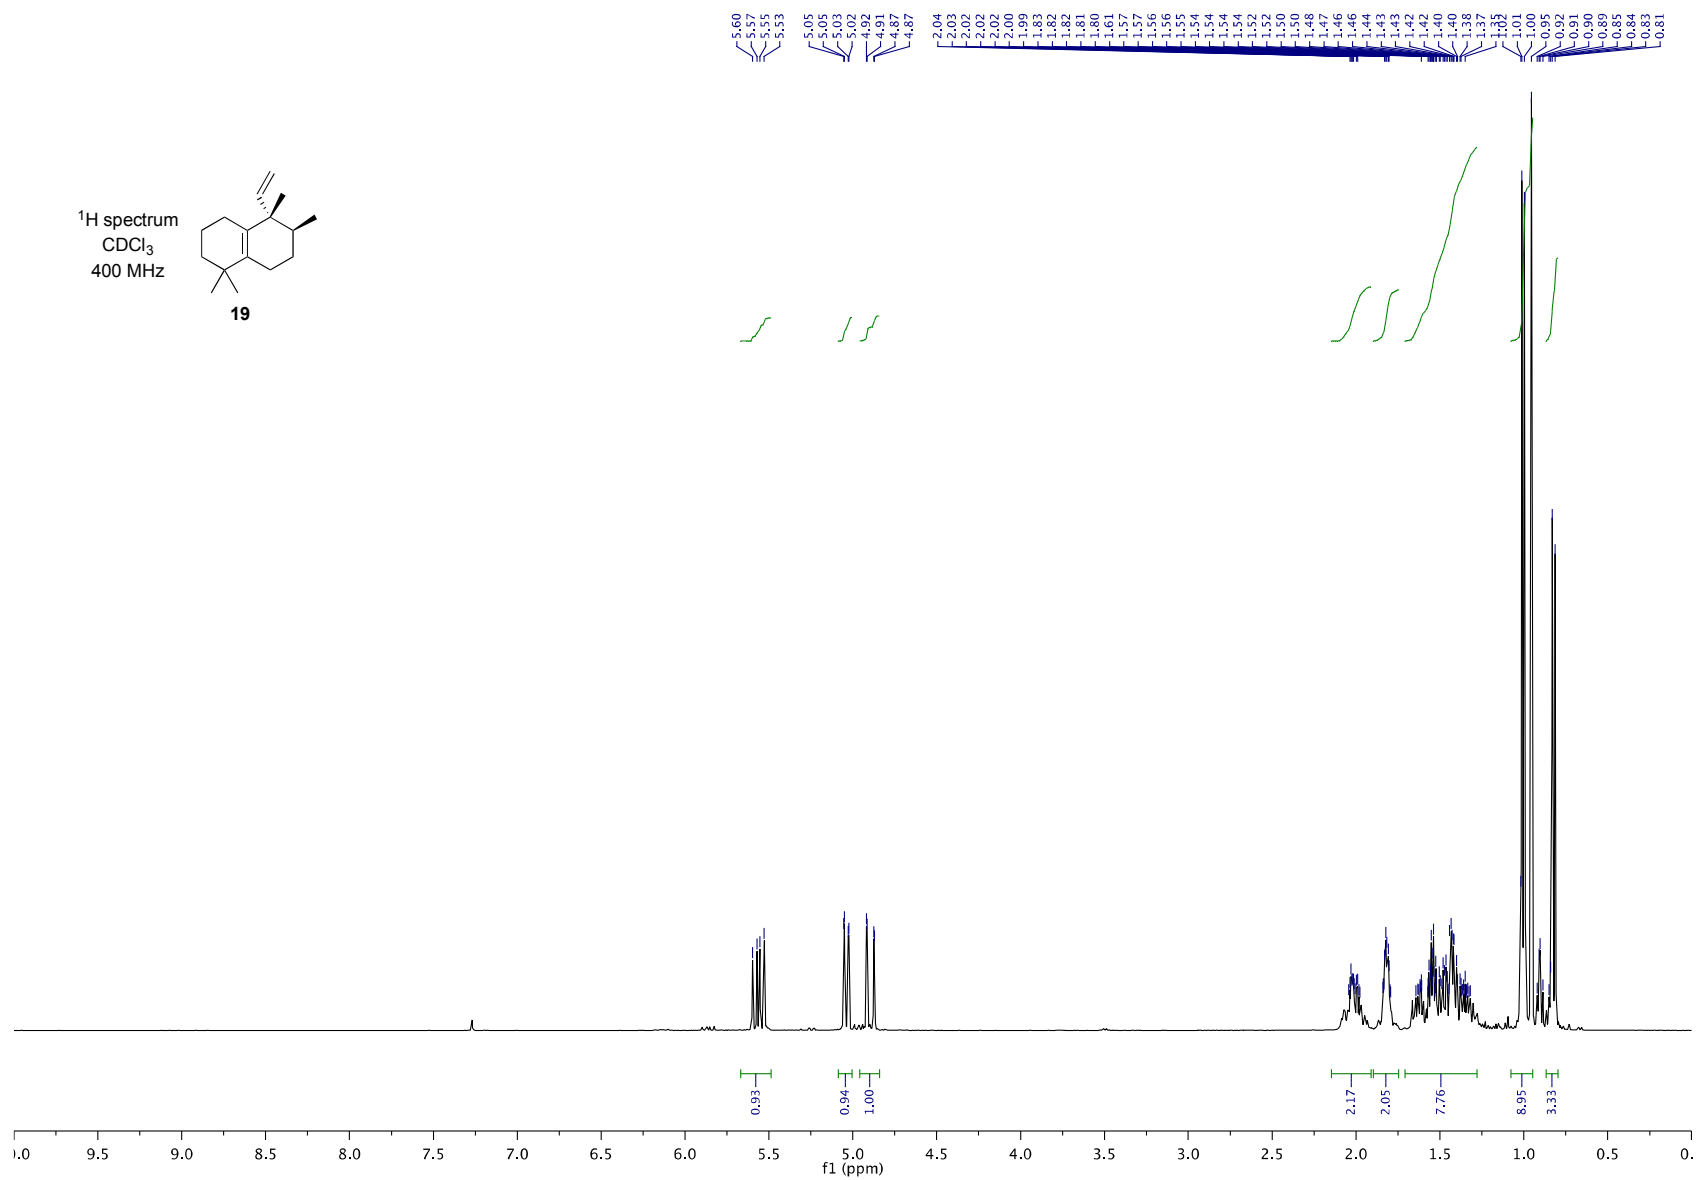



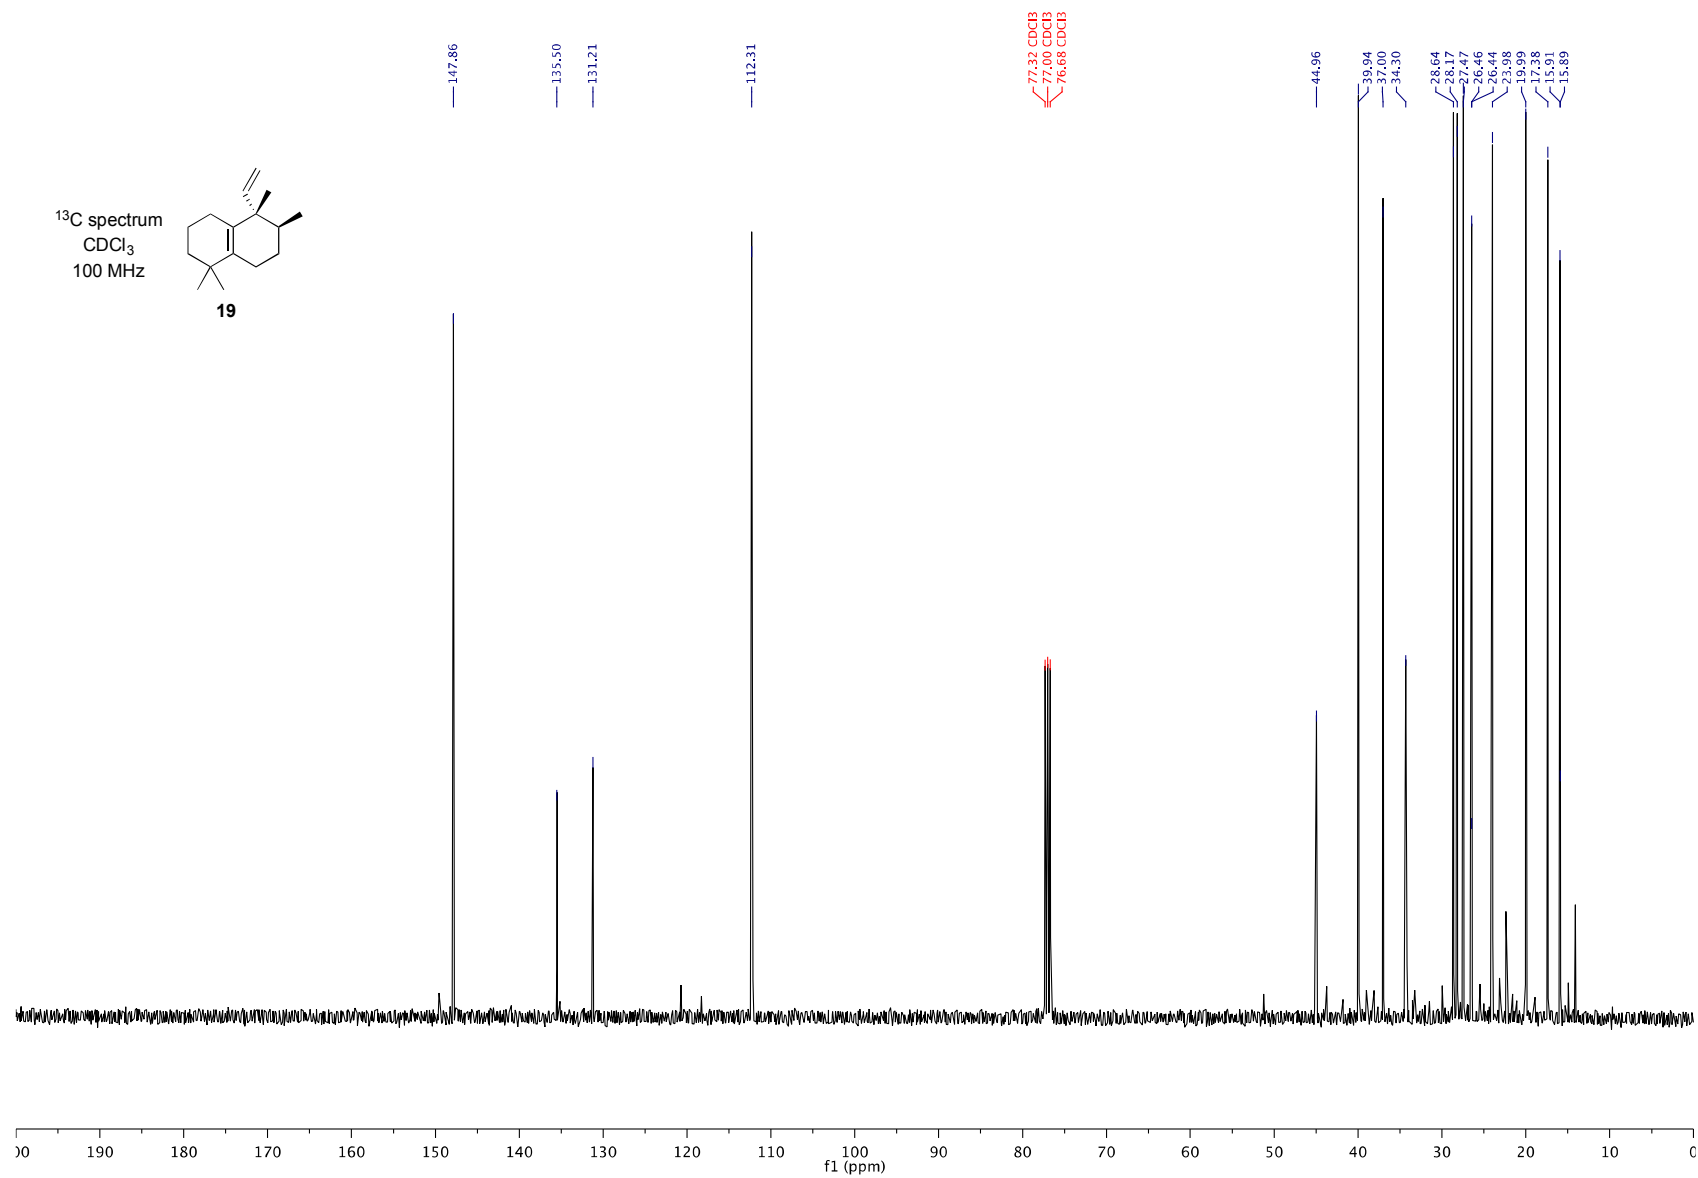



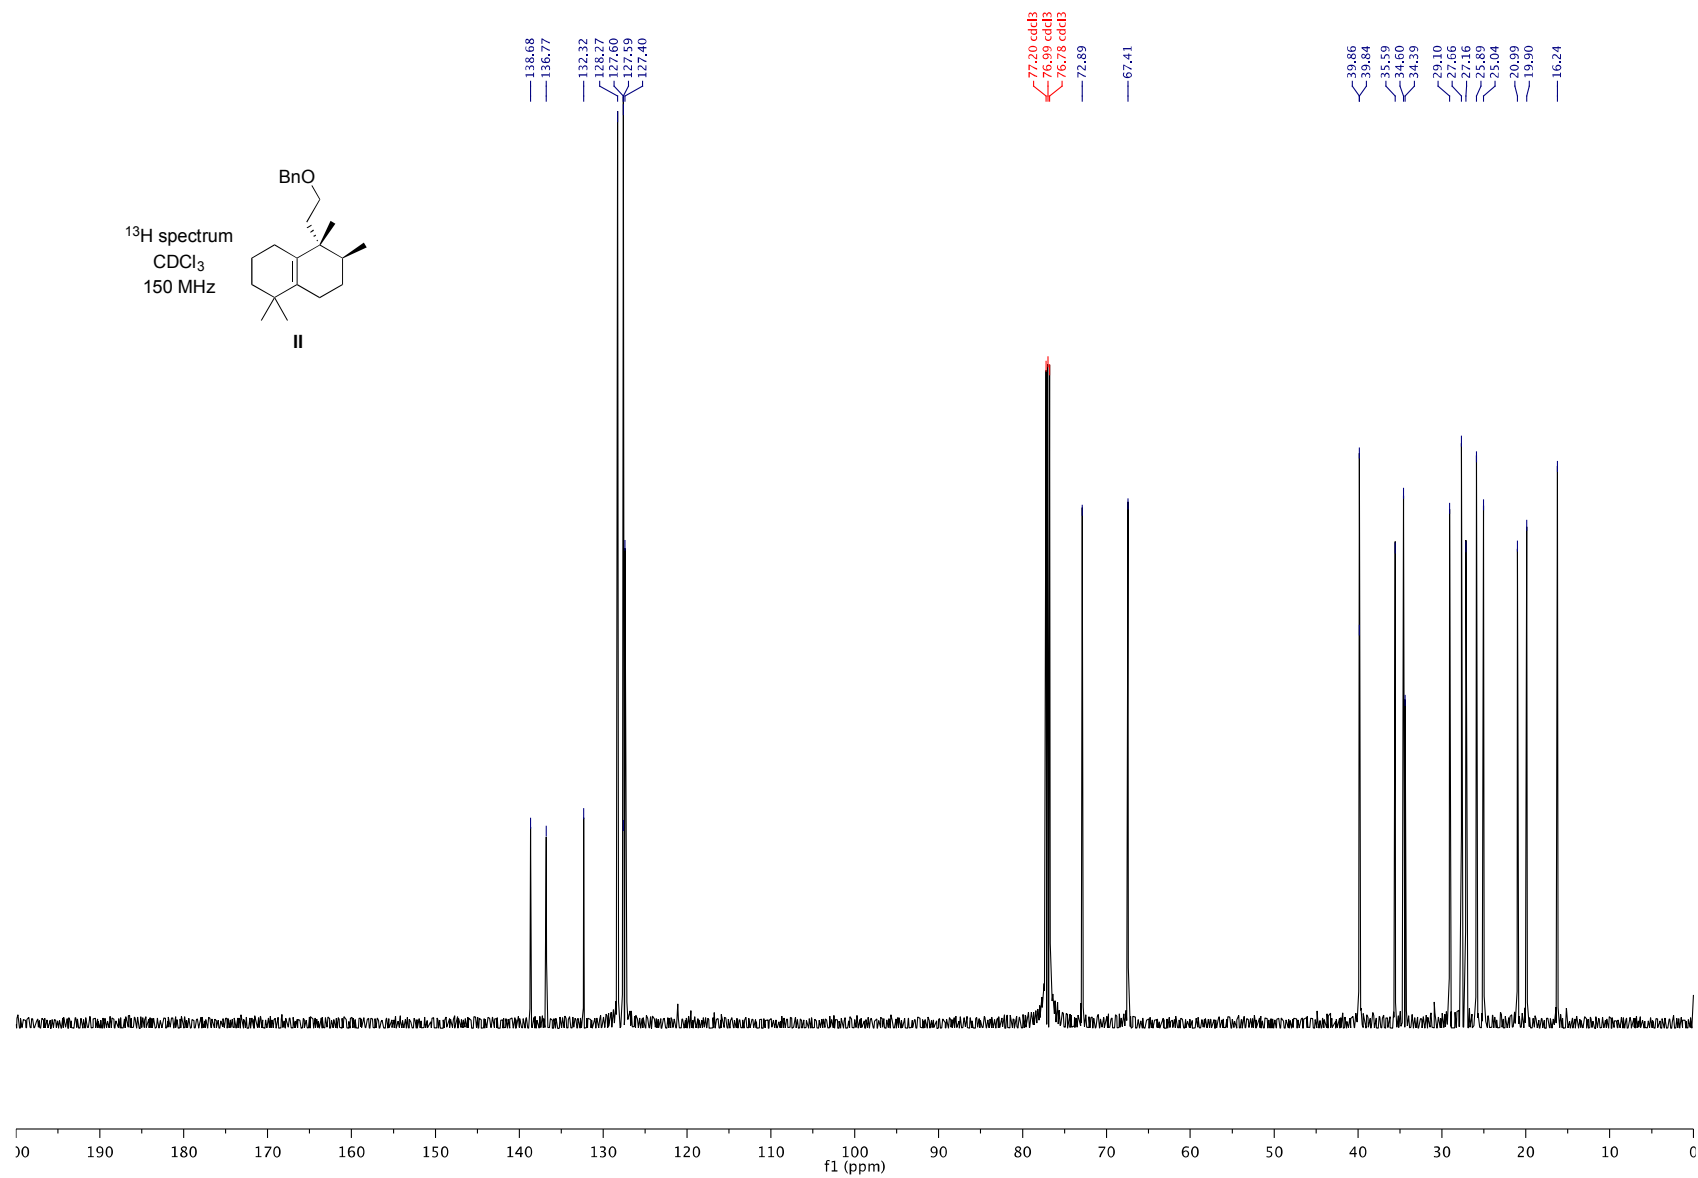

<sup>1</sup>H spectrum  
CDCl<sub>3</sub>  
400 MHz

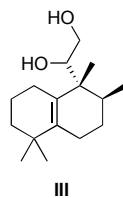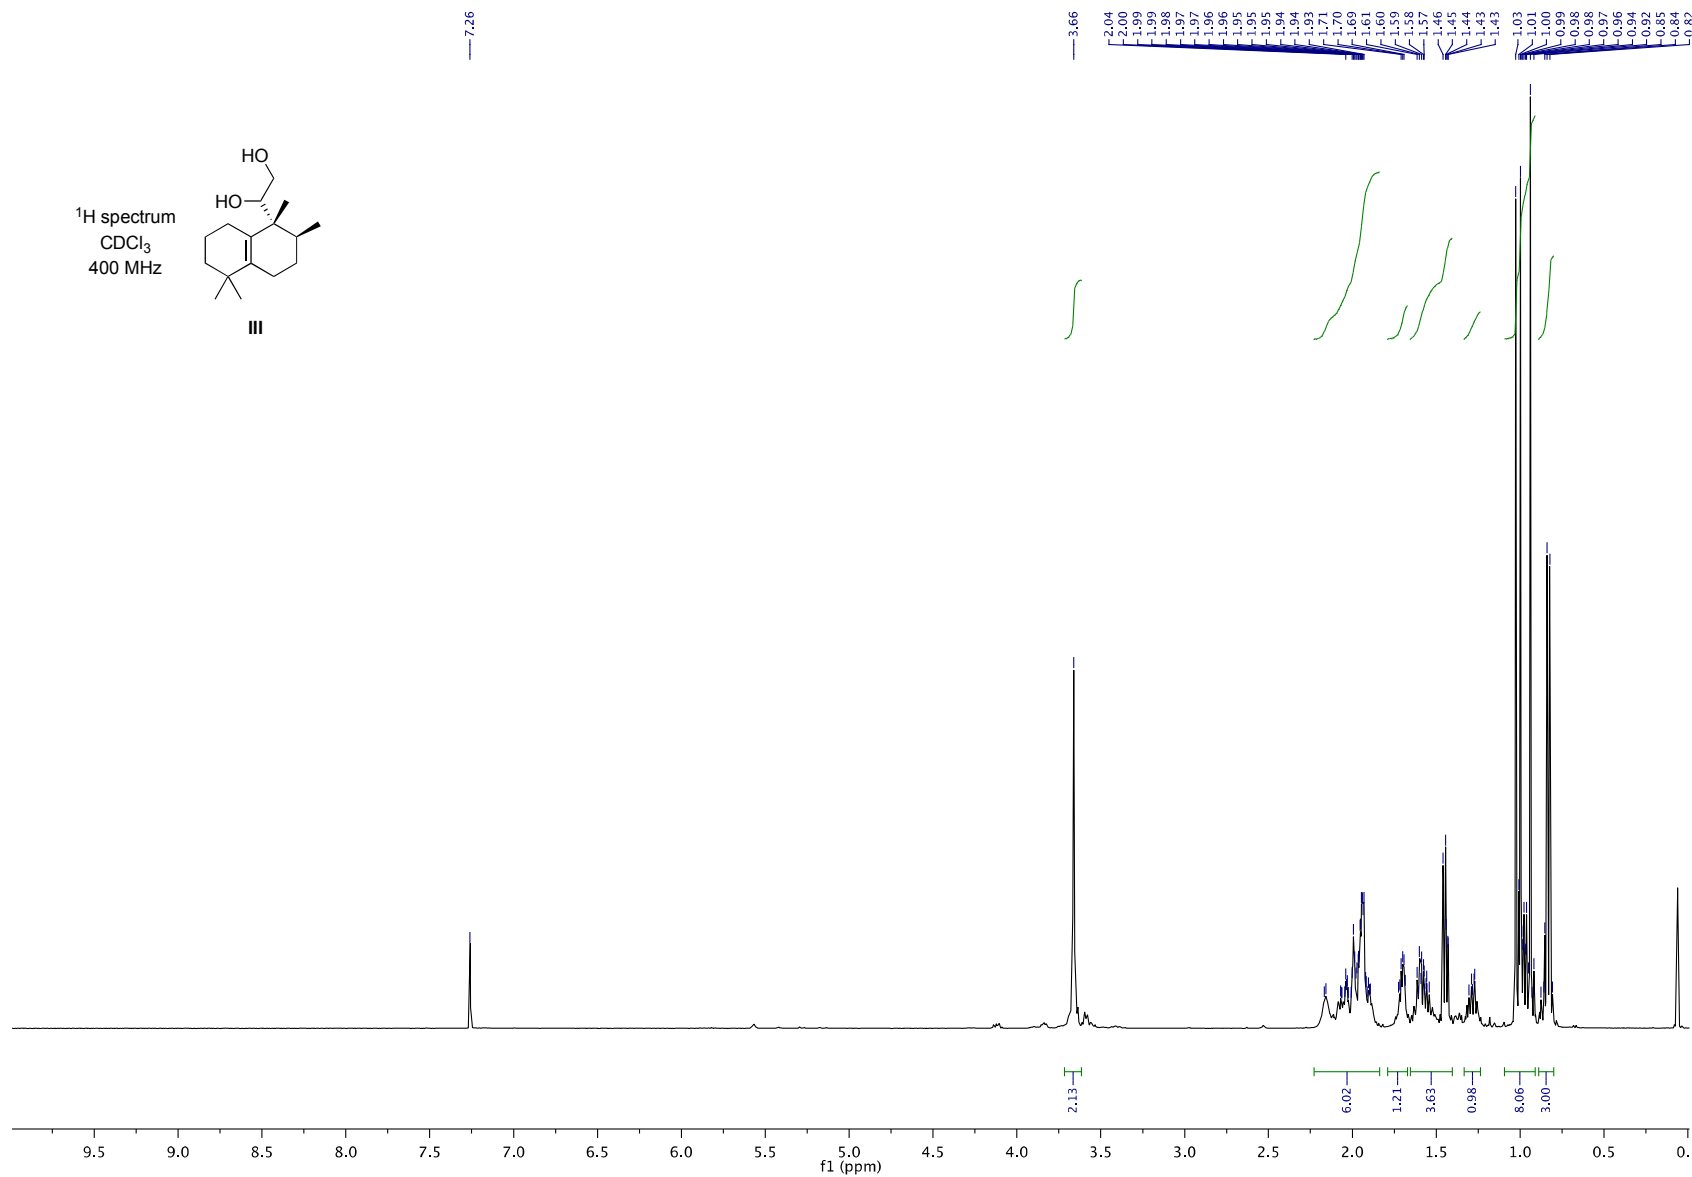

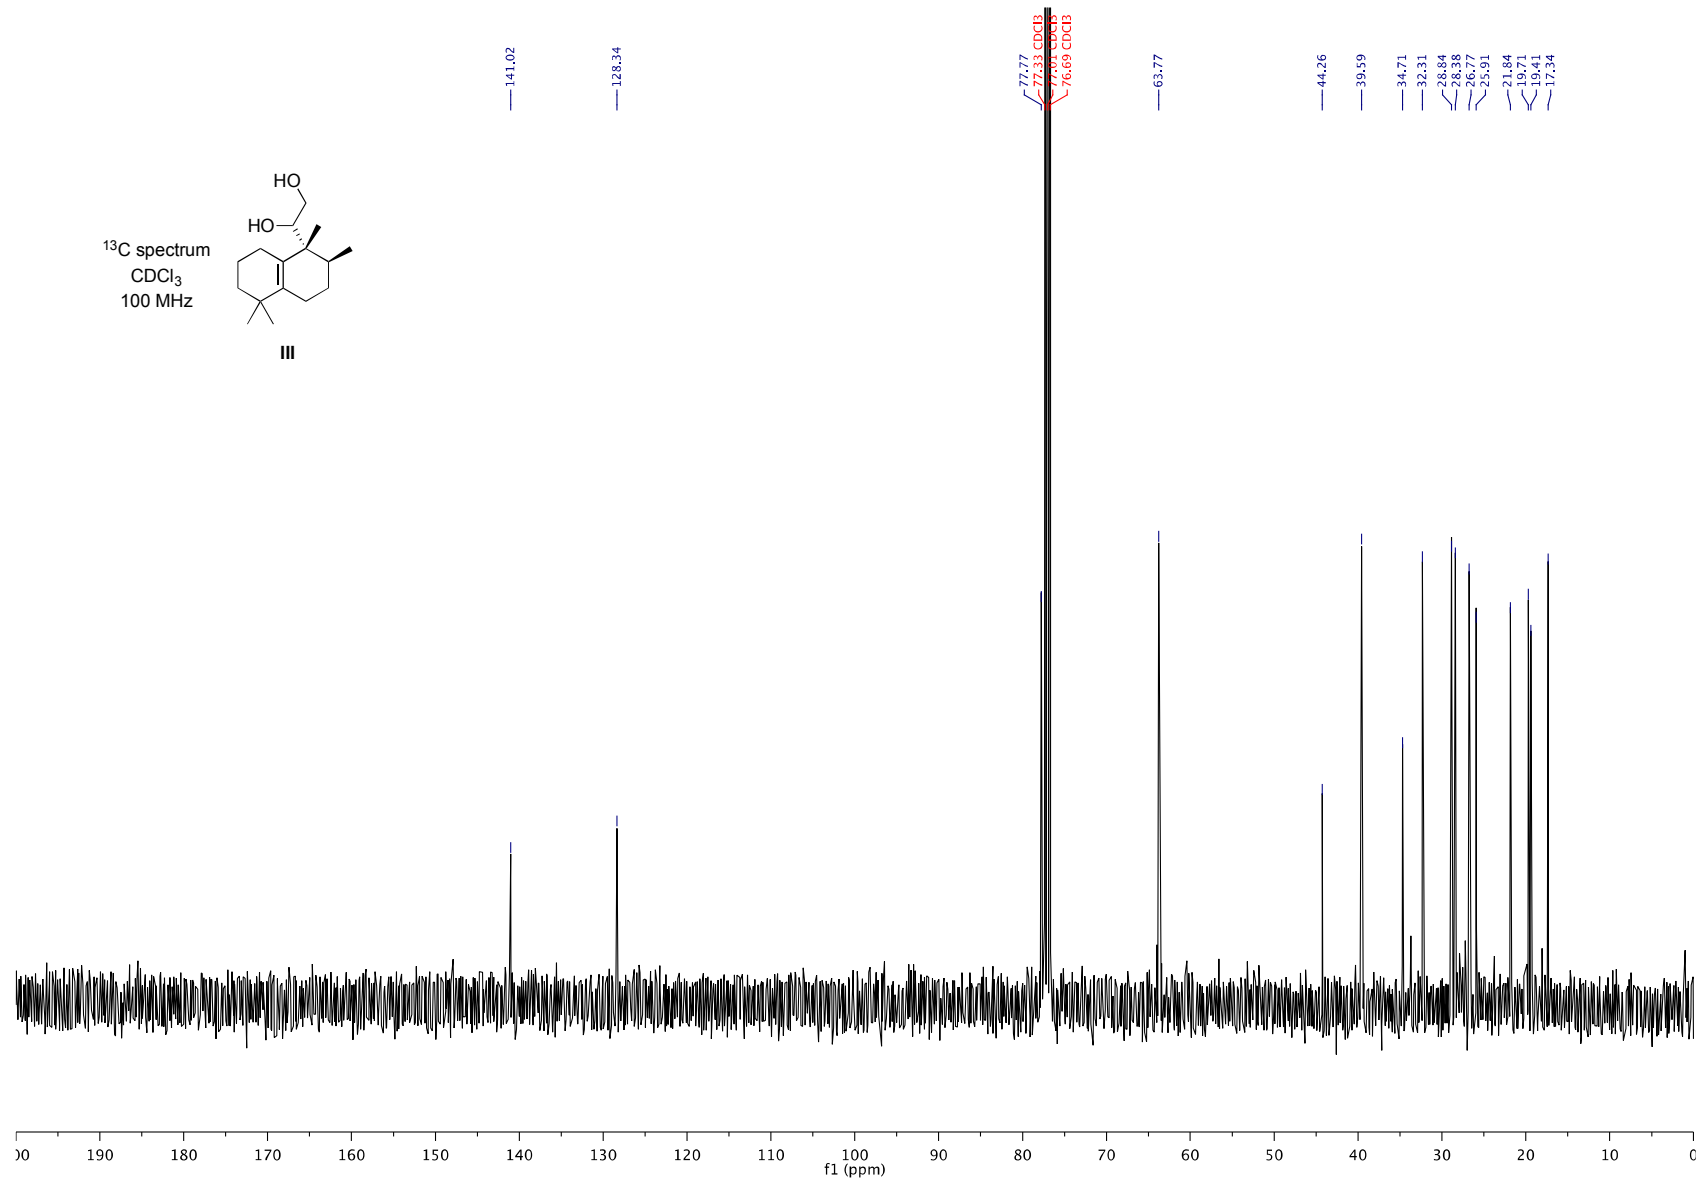

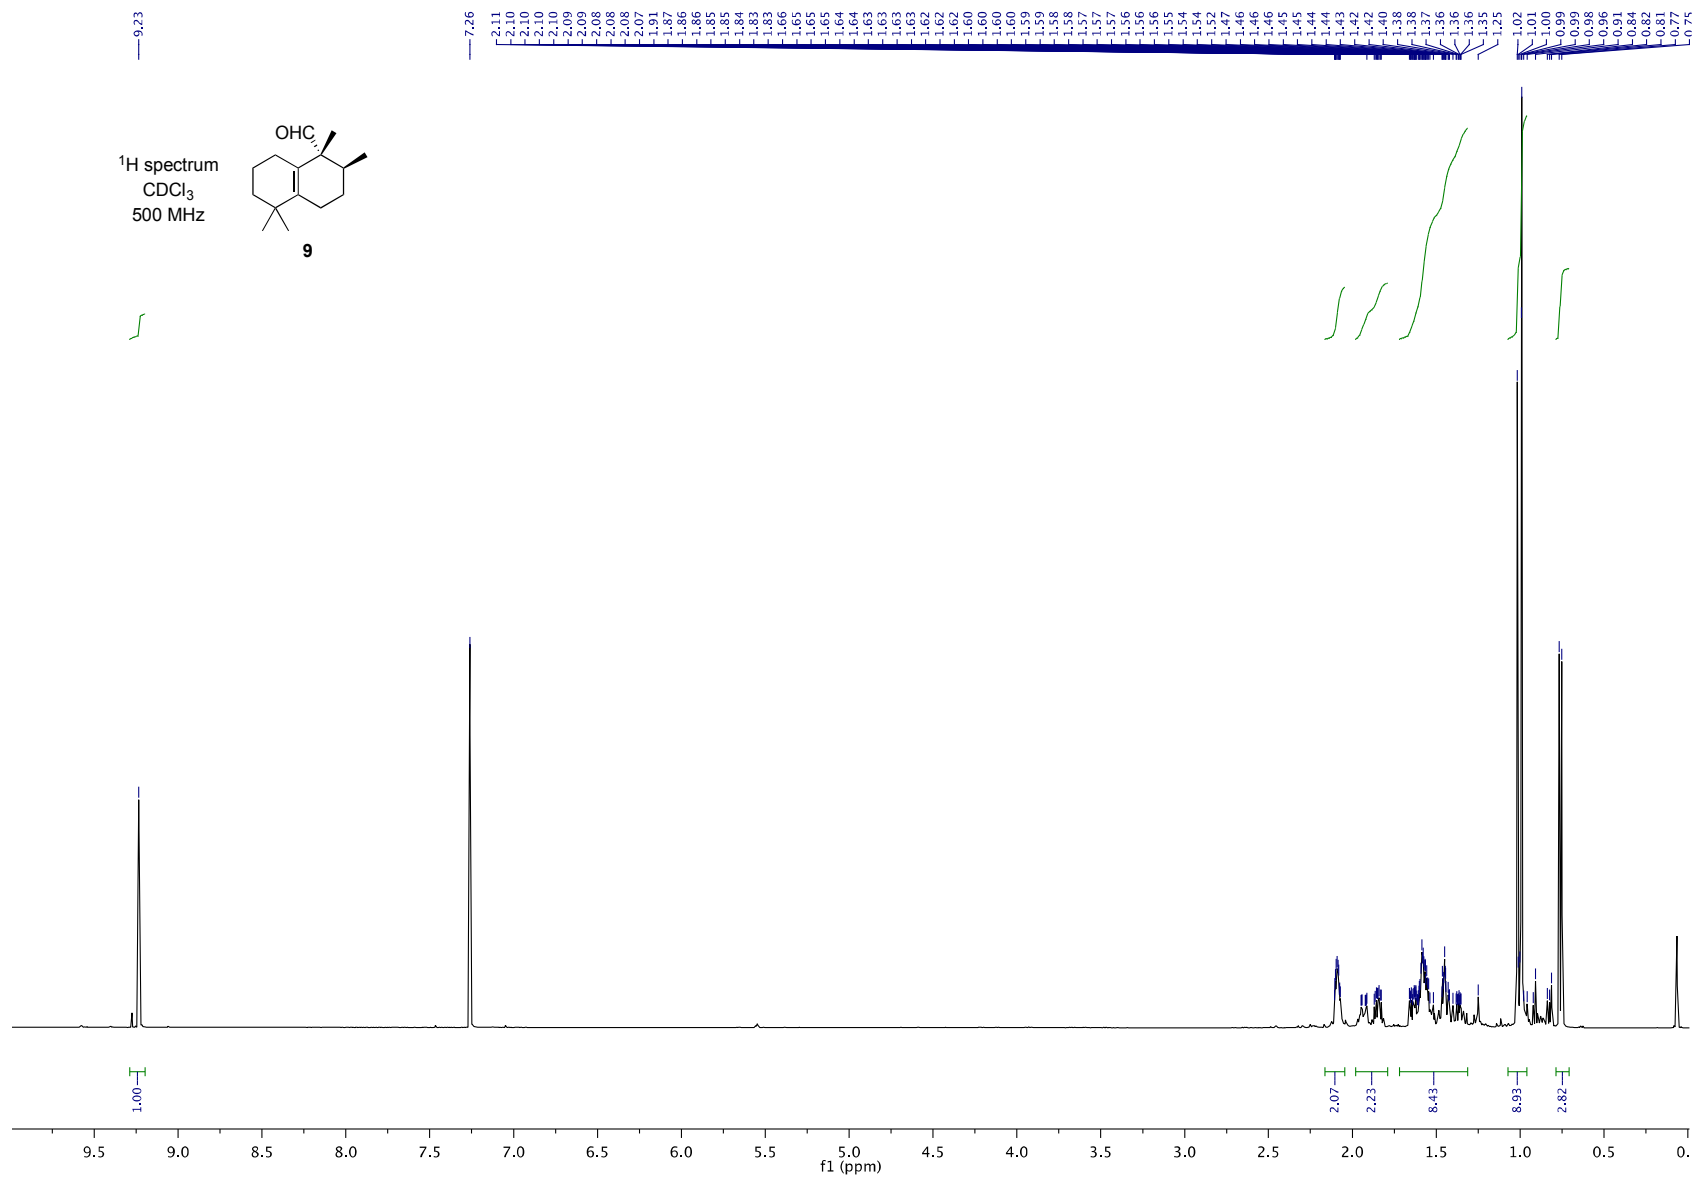

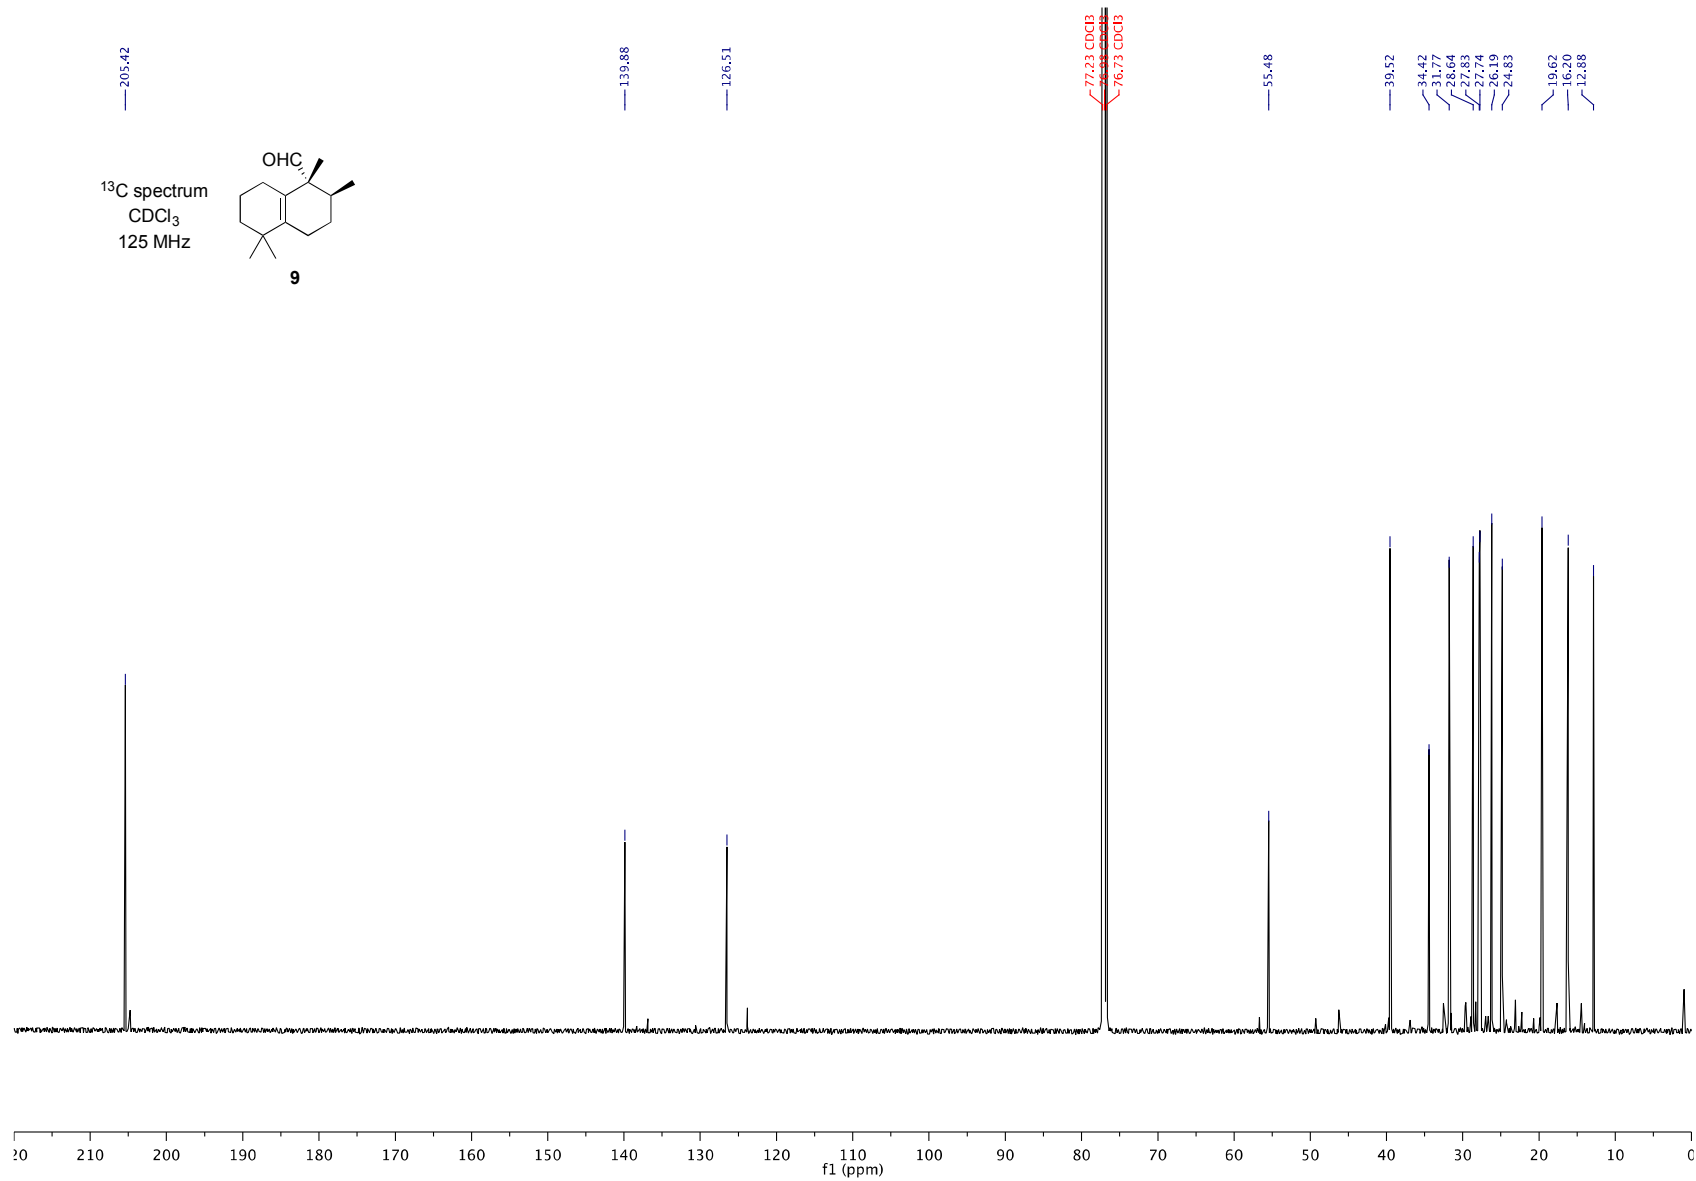

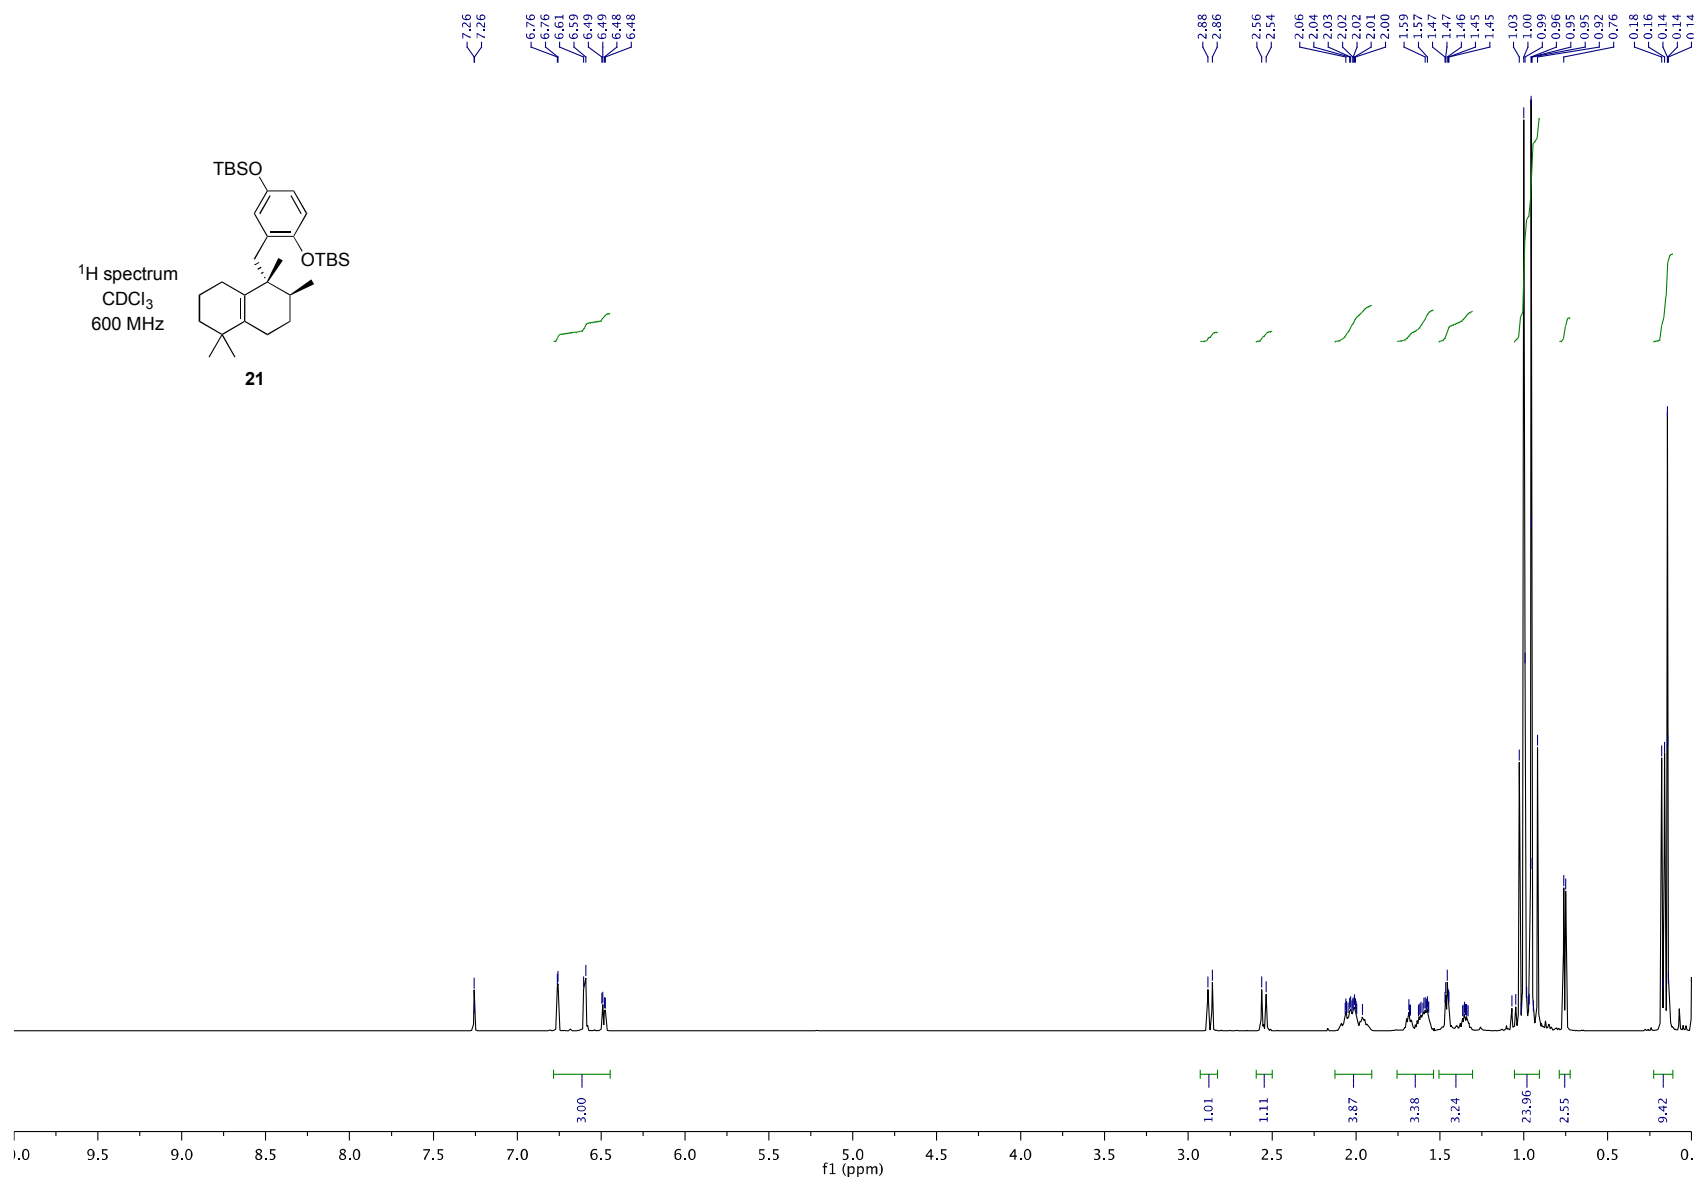





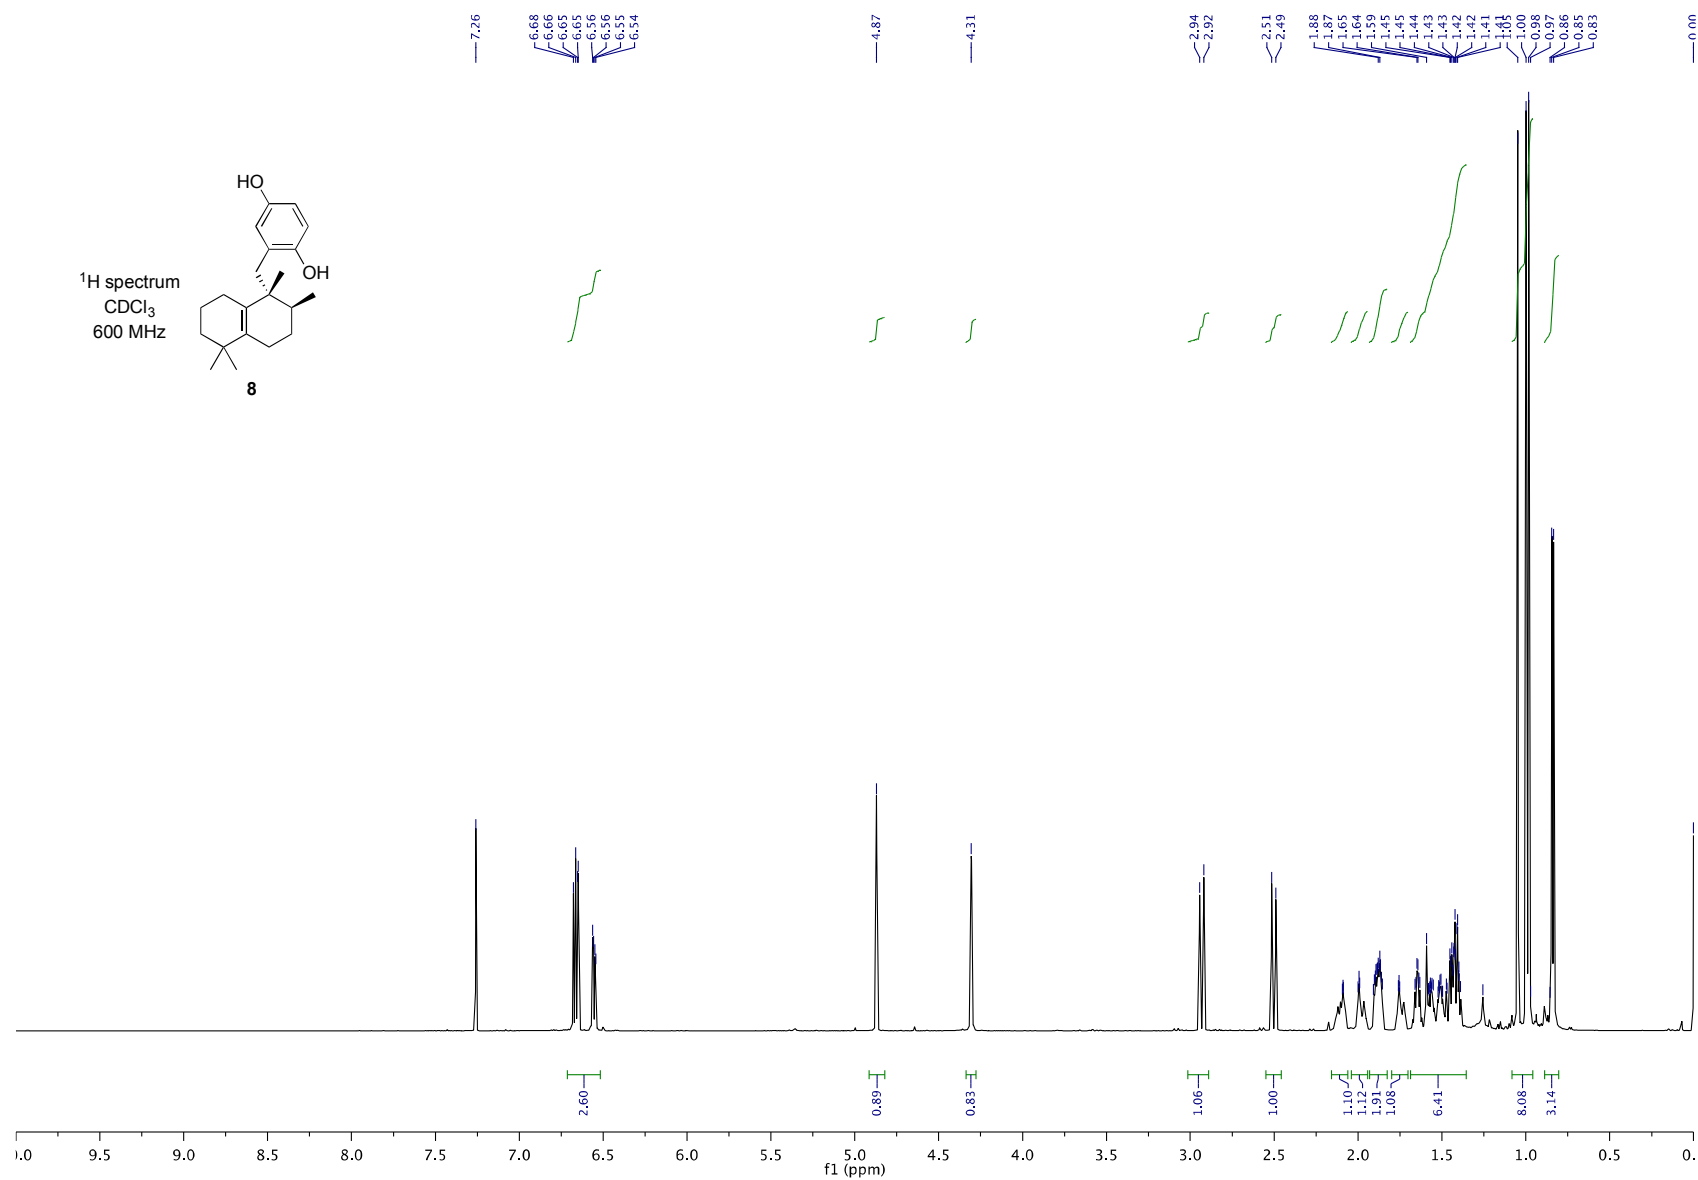

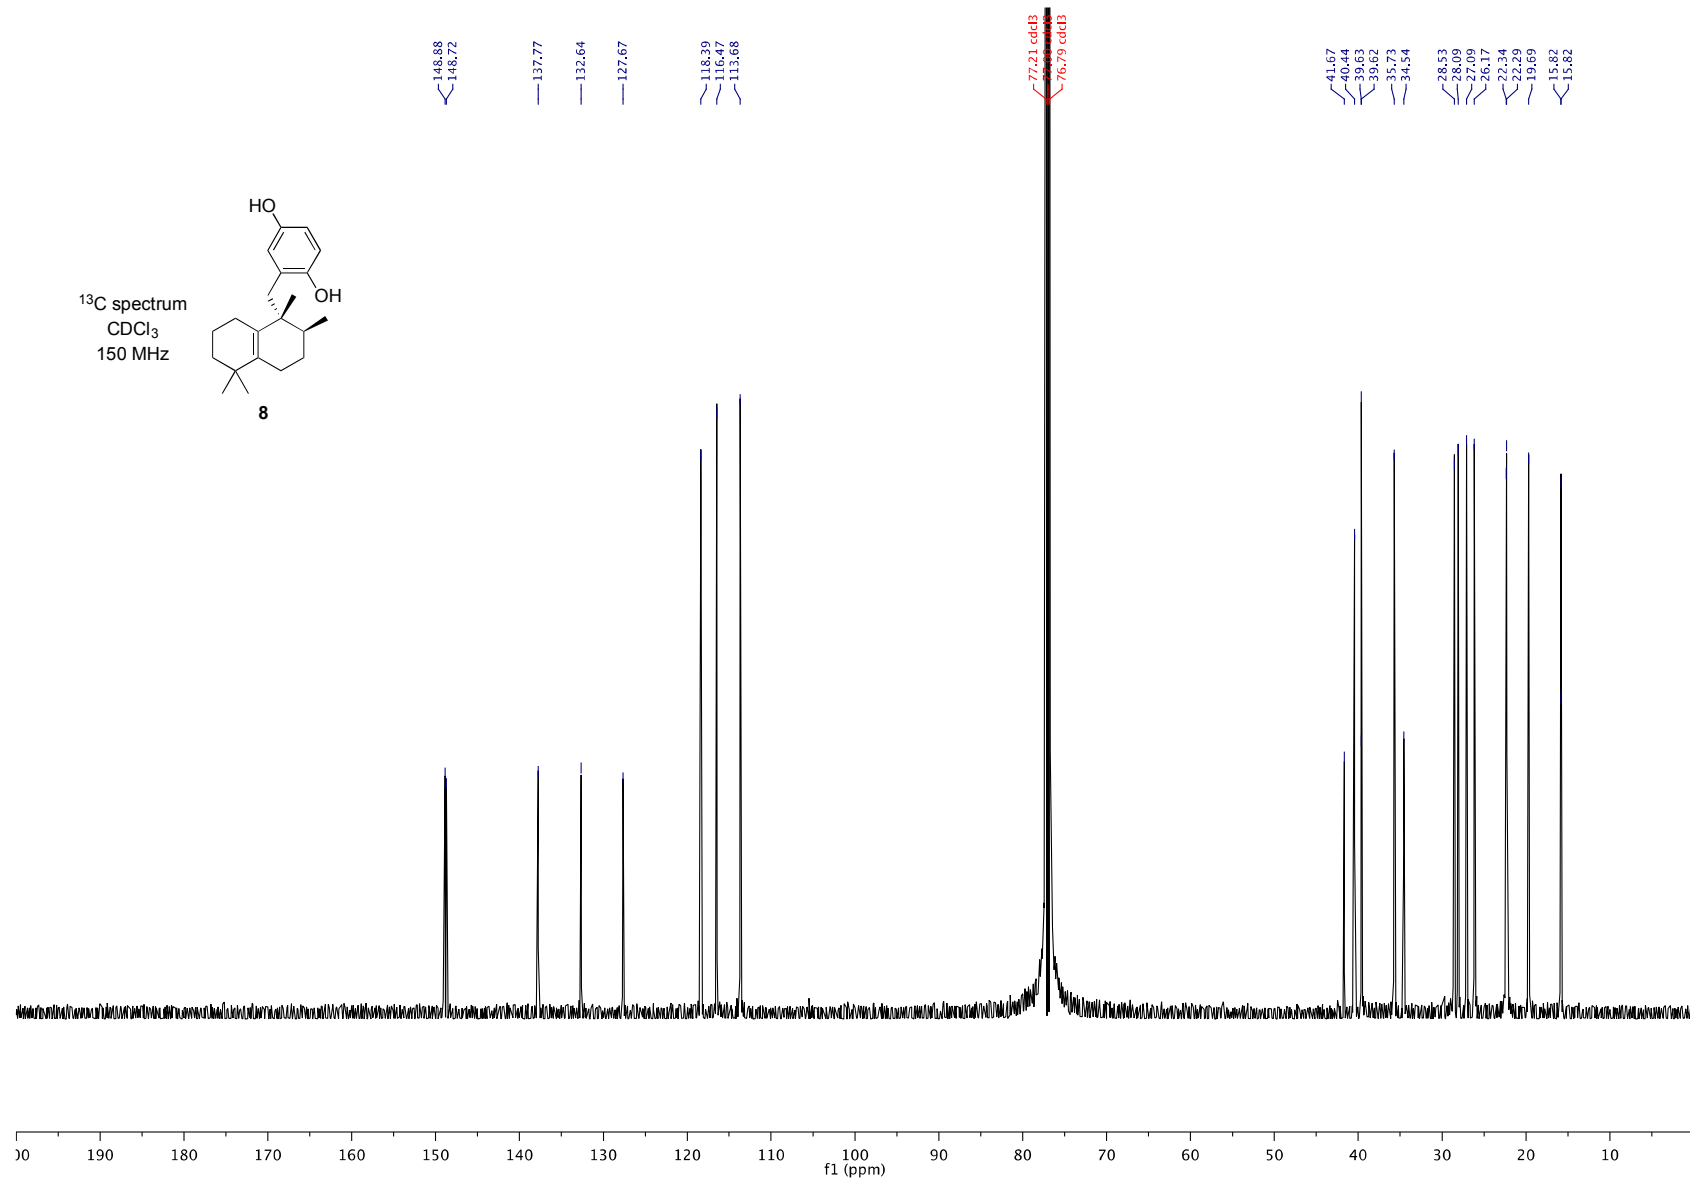

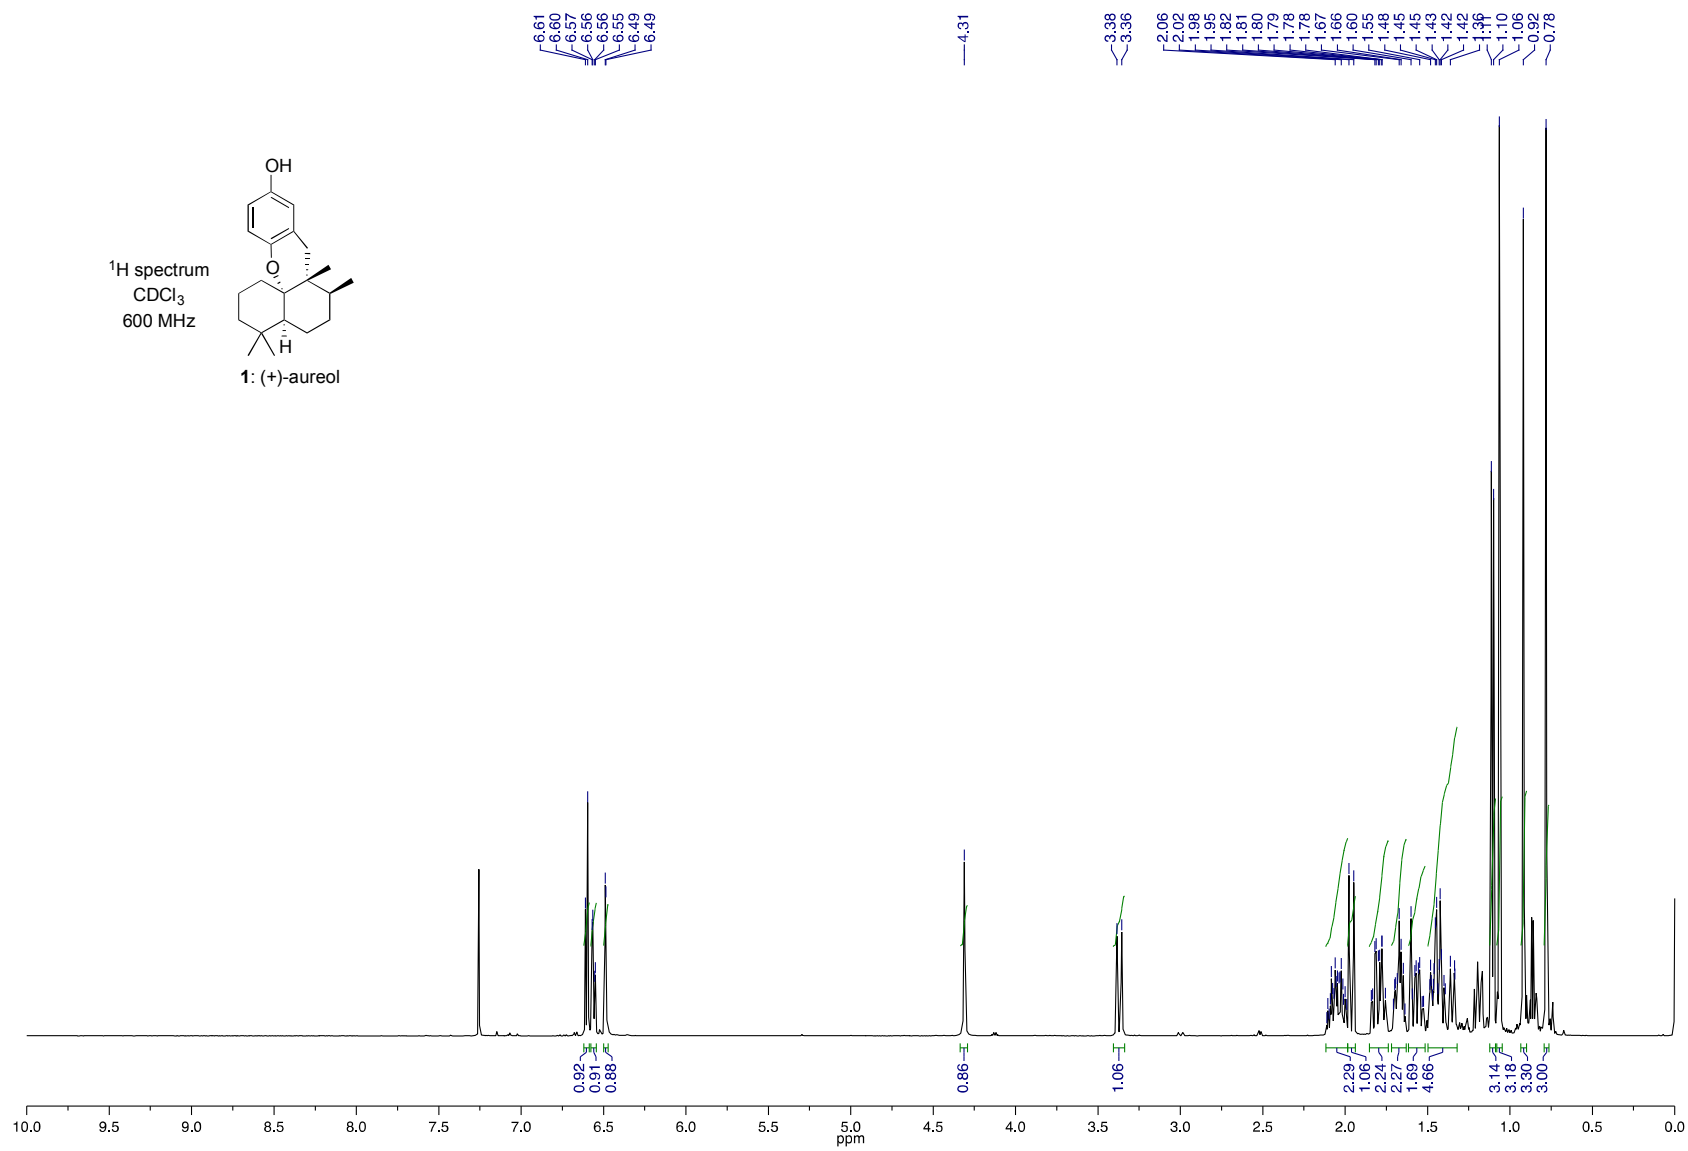

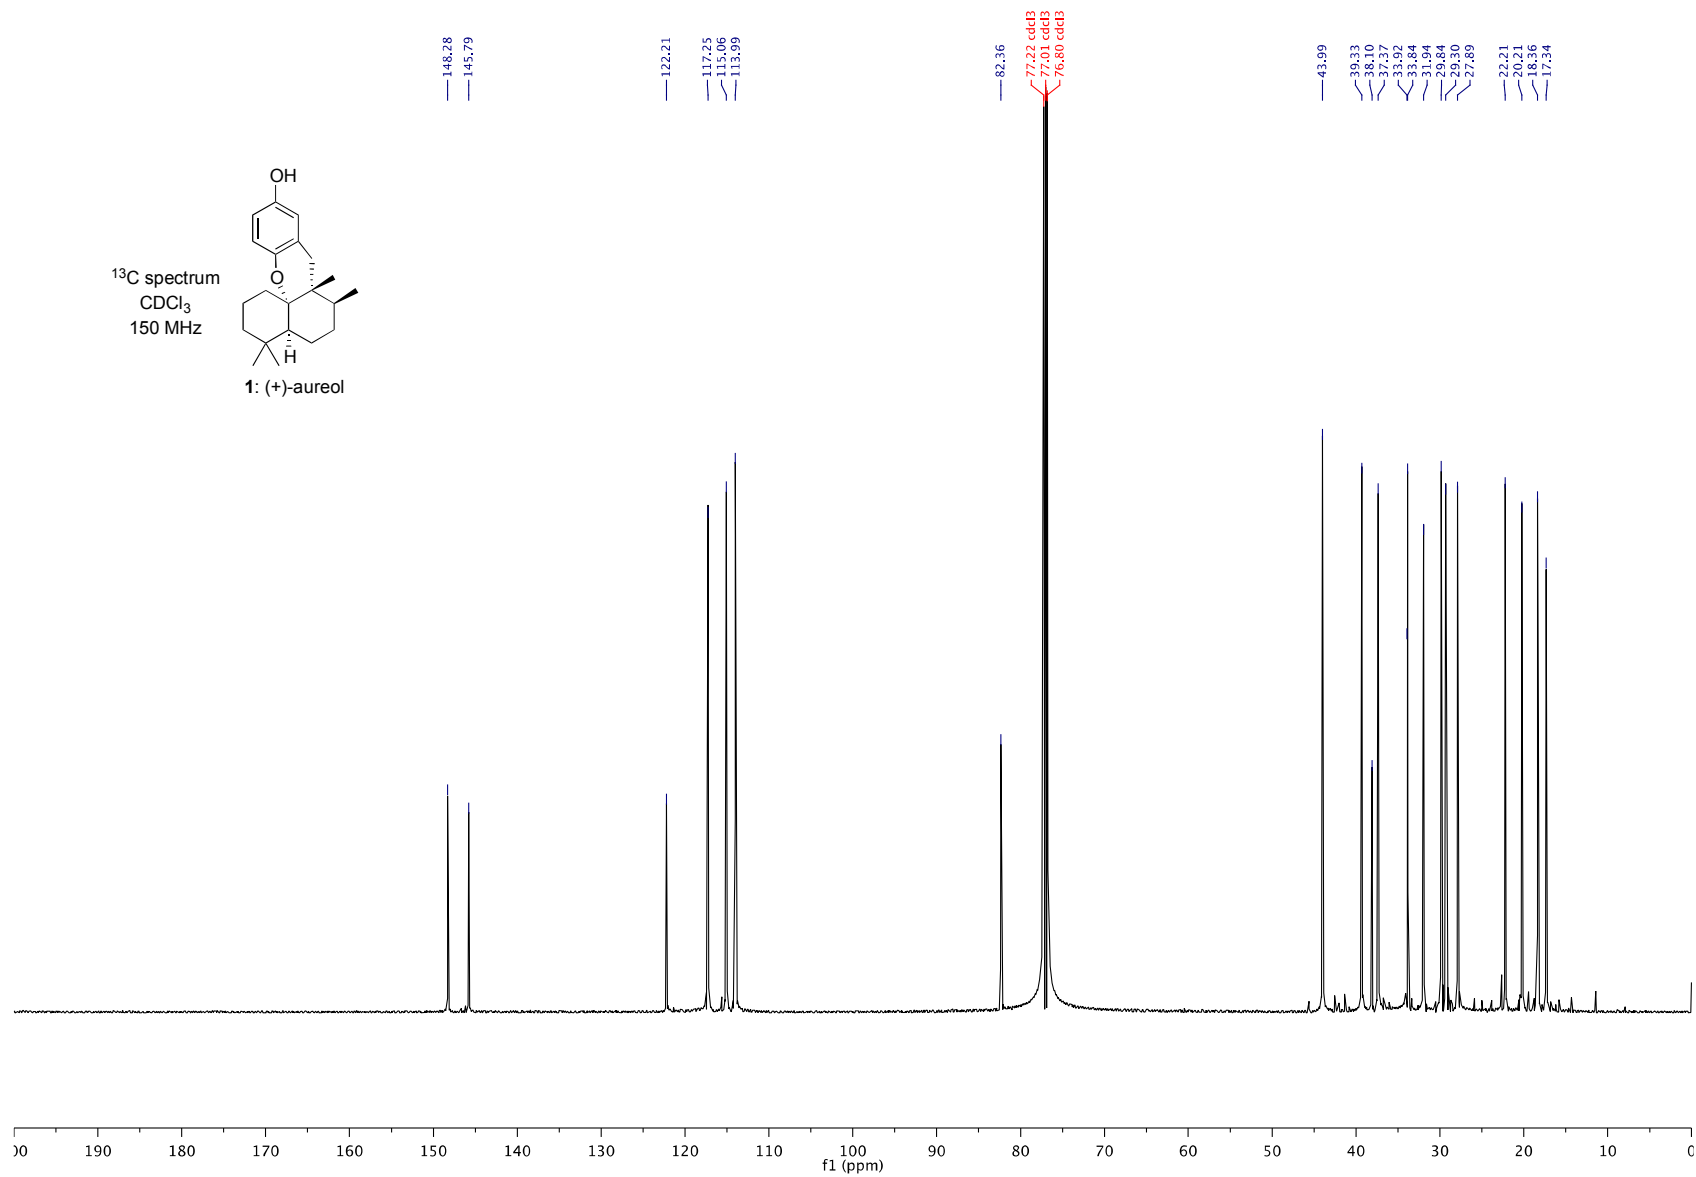

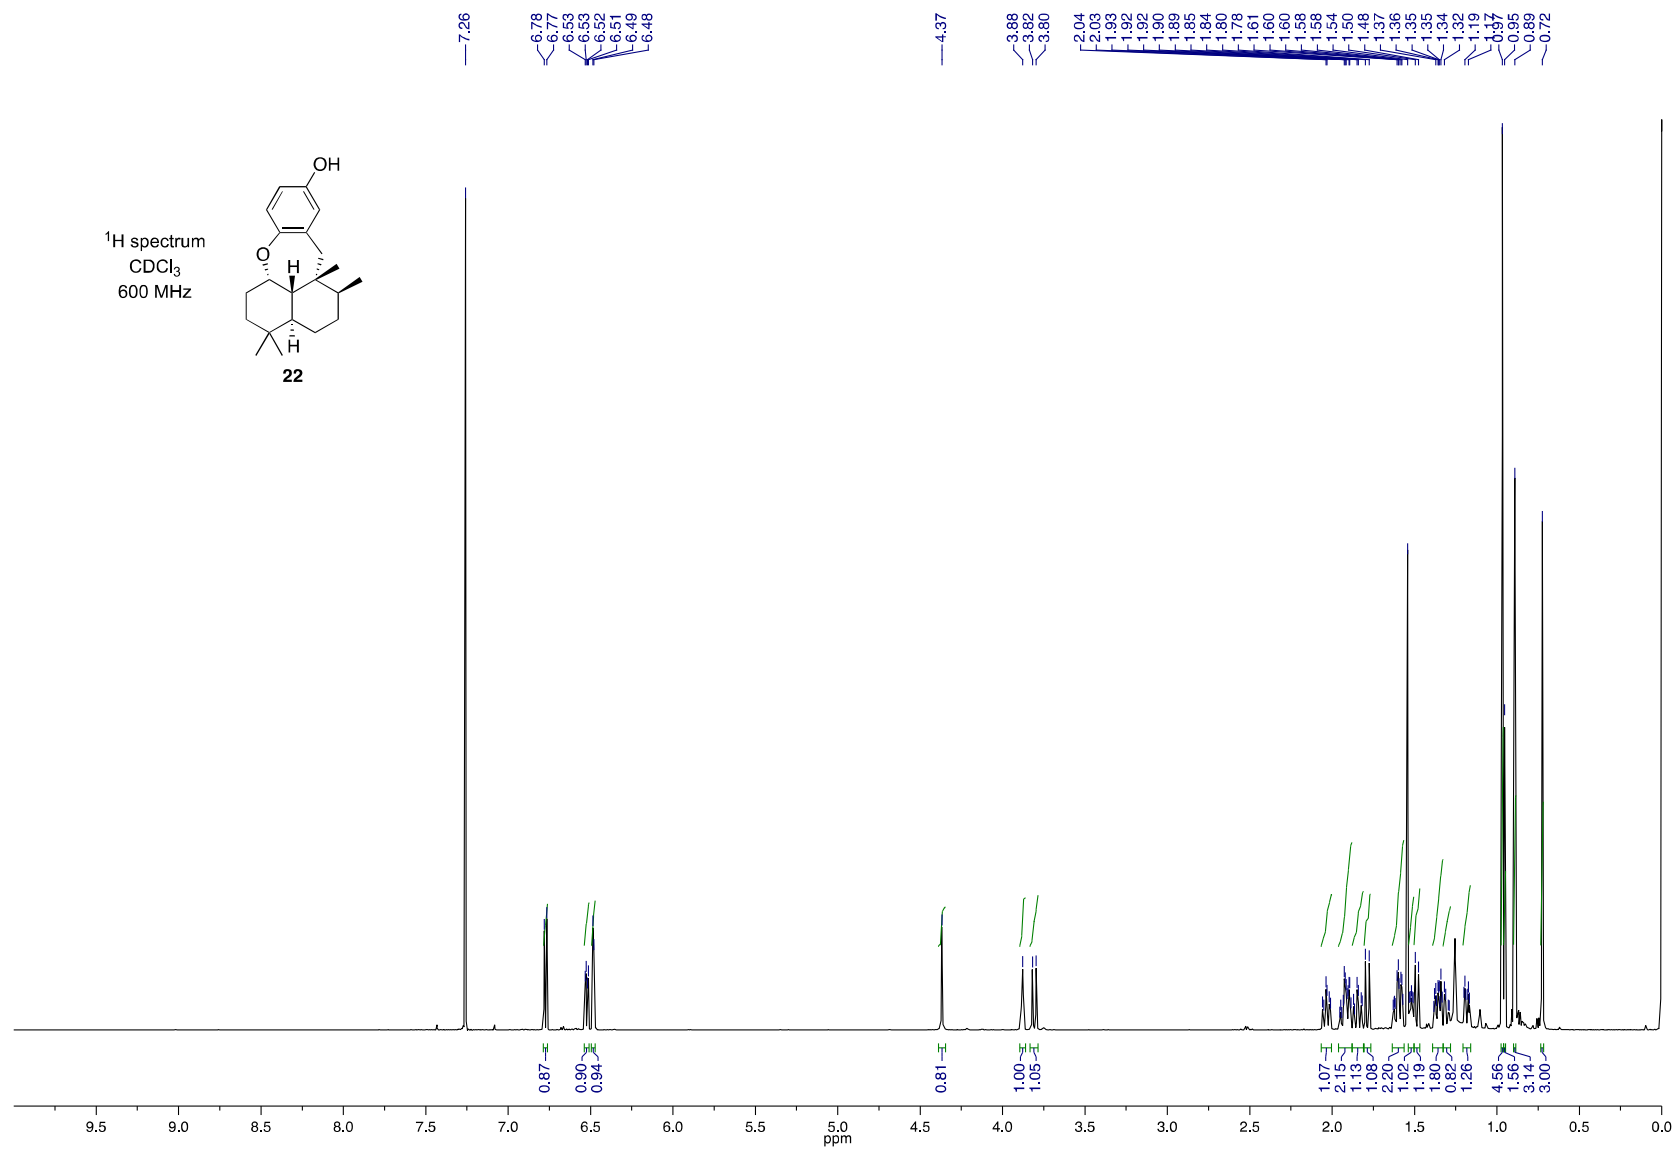

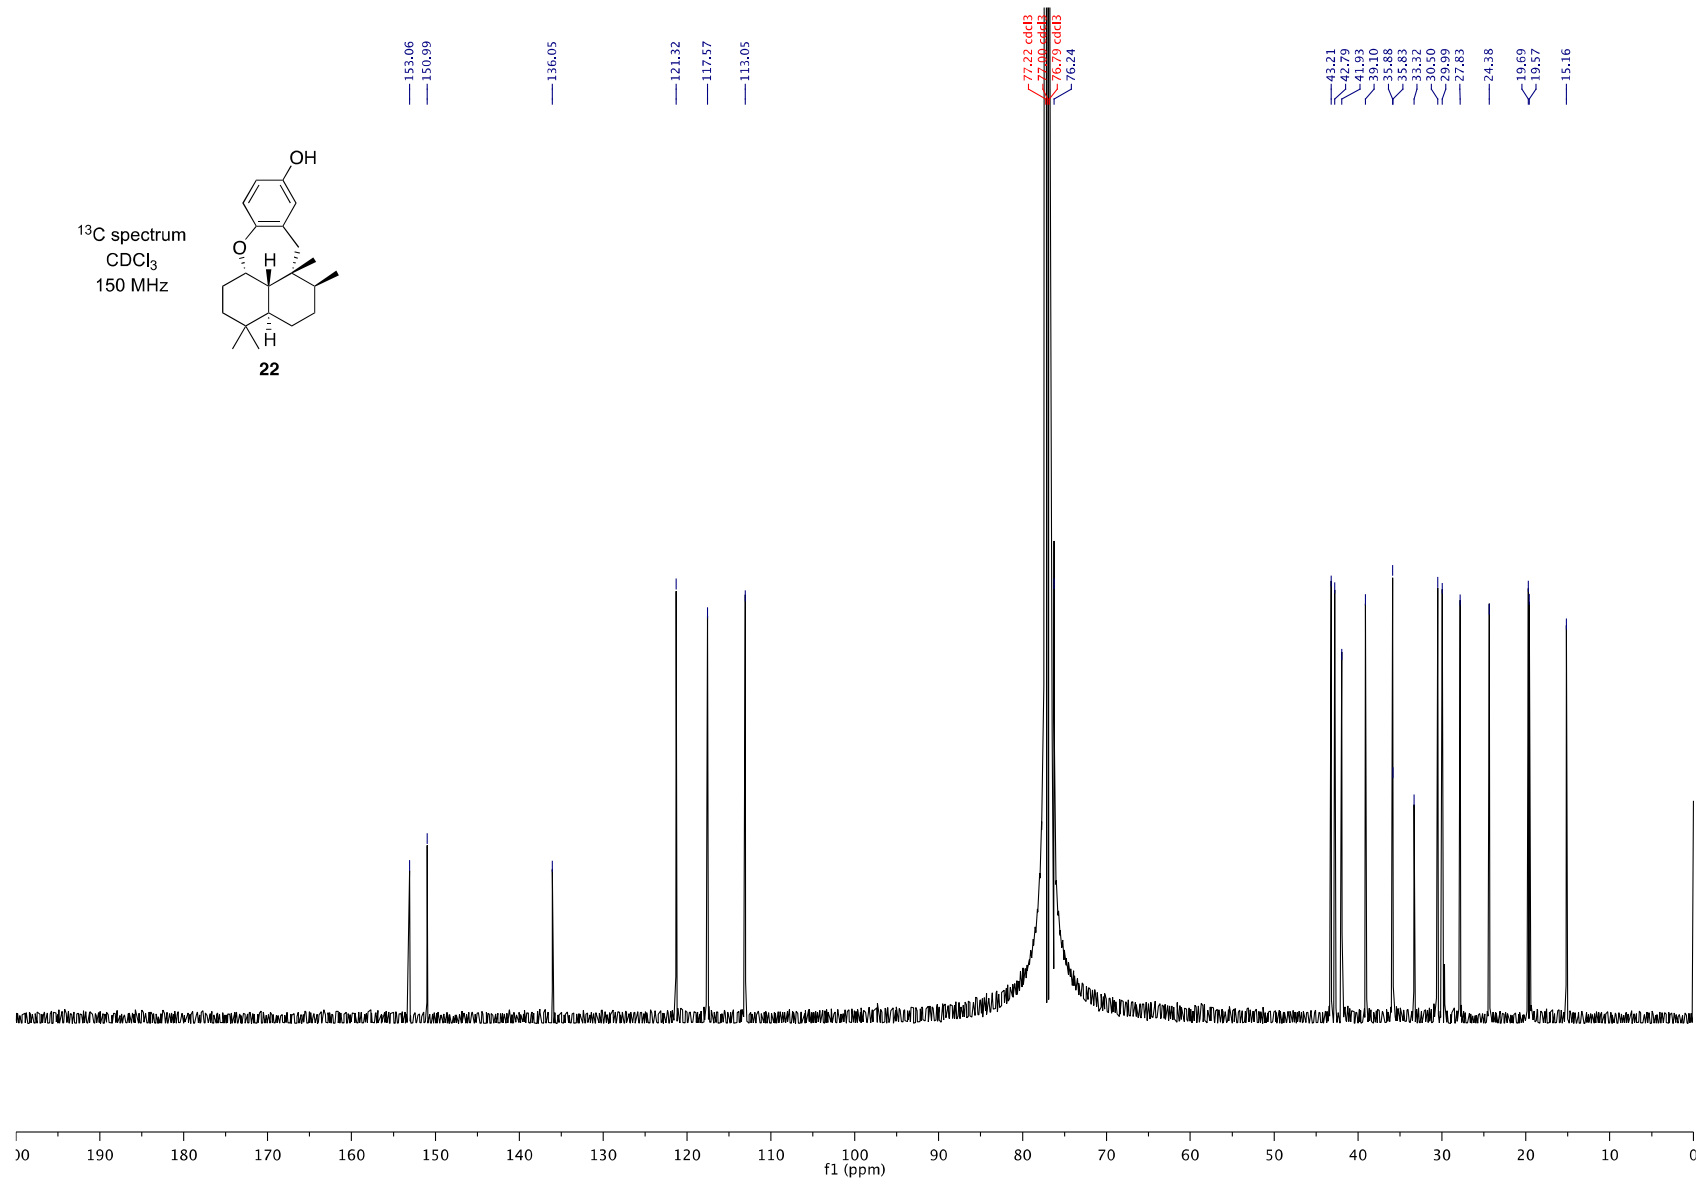

Supplement: Supplementary file 1 [file 4127479]
